# CHaRTr: An R toolbox for modeling Choices and Response Times in decision-making tasks

Chandramouli Chandrasekaran<sup>a,b,\*</sup>, Guy E. Hawkins<sup>c</sup>

<sup>a</sup>*Department of Psychological and Brain Sciences, Boston University, Boston, MA, USA*

<sup>b</sup>*Department of Anatomy and Neurobiology, Boston University School of Medicine, Boston, MA, USA*

<sup>c</sup>*School of Psychology, University of Newcastle, Australia*

---

## Abstract

Decision-making is the process of choosing and performing actions in response to sensory cues so as to achieve behavioral goals. A sophisticated research effort has led to the development of many mathematical models to describe the response time (RT) distributions and choice behavior of observers performing decision-making tasks. However, relatively few researchers use these models because it demands expertise in various numerical, statistical, and software techniques. Although some of these problems have been surmounted in existing software packages, the packages have often focused on the classical decision-making model, the diffusion decision model. Recent theoretical advances in decision-making that posit roles for “urgency”, time-varying decision thresholds, noise in various aspects of the decision-formation process or low pass filtering of sensory evidence, have proven to be challenging to incorporate in a coherent software framework that permits quantitative evaluations among these competing classes of decision-making models. Here, we present a toolbox — *Choices and Response Times in R*, or *CHaRTr* — that provides the user the ability to implement and test a wide variety of decision-making models ranging from classic through to modern versions of the diffusion decision model, to models with urgency signals, or collapsing boundaries. Earlier versions of *CHaRTr* have been instrumental in a number of recent studies of humans and monkeys performing perceptual decision-making tasks. We also provide guidance on how to extend the toolbox to incorporate future developments in decision-making models.

**Keywords:** Decision making, Response Time (RT), choice, diffusion decision model, DDM, urgency-gating, AIC, BIC, model selection

---

\*Corresponding Author

*Email addresses:* [cchandr1@bu.edu](mailto:cchandr1@bu.edu) (Chandramouli Chandrasekaran),  
[guy.hawkins@newcastle.edu.au](mailto:guy.hawkins@newcastle.edu.au) (Guy E. Hawkins)

<sup>1</sup>There are 10 figures, 7 listings, and 1 tables in this document.

## 1. Introduction

Perceptual decision-making is the process of choosing and performing appropriate actions in response to sensory cues to achieve behavioral goals (Freedman and Assad, 2011; Gold and Shadlen, 2007; Hoshi, 2013; O'Connell et al., 2018; Shadlen and Kiani, 2013; Shadlen and Newsome, 2001). A sophisticated research effort in multiple fields has led to the formulation of cognitive process models to describe decision-making behavior (Donkin and Brown, 2018; Ratcliff et al., 2016). The majority of these models are grounded in the "sequential sampling" framework, which posits that decision-making involves the gradual accumulation of noisy sensory evidence over time until a bound (or criterion/threshold) is reached (Brunton et al., 2013; Forstmann et al., 2016; Gold and Shadlen, 2007; Hanks et al., 2014; Ratcliff and McKoon, 2008; Ratcliff et al., 2016; Shadlen and Kiani, 2013). Models derived from the sequential sampling framework are typically elaborated with various systematic and random components so as to implement assumptions and hypotheses about the underlying cognitive processes involved in perceptual decision-making (Diederich, 1997a; Ratcliff et al., 2016).

The most prominent sequential sampling model of decision-making is the diffusion decision model (DDM), which has an impressive history of success in explaining the behavior of human and animal observers (e.g., Ding and Gold, 2012a,b; Forstmann et al., 2016; Palmer et al., 2005; Ratcliff et al., 2016; Tsunada et al., 2016). However, recent studies propose alternative sequential sampling models that do not involve the integration of sensory evidence over time. Instead, novel sensory evidence is multiplied by an urgency signal that increases with elapsed decision time, and a decision is made when the signal exceeds the criterion (Cisek et al., 2009; Ditterich, 2006b; Thura et al., 2012). Another line of research proposes that observers aim to maximize their reward rate and suggests that the decision boundary dynamically decreases as the time spent making a decision grows longer. Such a framework has been argued to provide a better explanation for decision-making behavior in the face of sensory uncertainty (Drugowitsch et al., 2012).

One approach to distinguish between these different models is to systematically manipulate the stimulus statistics and/or the task structure and then test whether behavior is qualitatively consistent with one or another sequential sampling model (Brunton et al., 2013; Carland et al., 2015; Cisek et al., 2009; Scott et al., 2015; Thura and Cisek, 2014). An alternative approach is to quantitatively analyze the choice and RT behavior with a large set of candidate models, and then carefully use model selection techniques to understand the candidate models that best describe the data (e.g., Chandrasekaran et al., 2017; Evans et al., 2017; Hawkins et al., 2015b; Purcell and Kiani, 2016). The quantitative modeling and model selection approach allows the researcher to determine whether a particular model component (e.g., an urgency signal, or variability in the rate of information accumulation) is important for generating the observed behavioral data. It also provides a holistic method for testing model adequacy, because the proposed model is judged on its ability to account for all available data rather than focusing on a specific subset of the data (e.g., Evans et al., 2017).

Despite the apparent benefits of model selection, there are technical and computational challenges in the application of decision-making models to behavioral data. Some researchers have surmounted these issues by simplifying the process: using analytical solutions for the predicted

42 mean RT and accuracy from the simplest form of the DDM, applied to participant-averaged  
43 behavioral data (Palmer et al., 2005; Tsunada et al., 2016). However, the complete distribution  
44 of RTs is highly informative, and often necessary, to reliably discriminate between the latent  
45 cognitive processes that influence decision-making (Forstmann et al., 2016; Luce, 1986; Ratcliff  
46 and McKoon, 2008; Ratcliff et al., 2016). Until recently, applying sequential sampling models  
47 like the DDM to the joint distribution over choices and RT required bespoke domain knowledge  
48 and computational expertise. This has hindered the widespread adoption of quantitative model  
49 selection methods to study decision-making behavior.

50 Some recent attempts have demystified the application of cognitive models of decision-making  
51 to behavioral data, providing a path for researchers to apply these methods to their own research  
52 questions. For instance, Vandekerckhove and Tuerlinckx developed the Diffusion Modeling and  
53 Analysis Toolbox (Vandekerckhove and Tuerlinckx, 2008), and Voss and Voss developed the  
54 diffusion model toolbox (fast-dm; Voss and Voss, 2007, 2008). Modern releases have improved  
55 the parameter estimation algorithms and can leverage multiple observers to perform hierarchical  
56 Bayesian inference (Wiecki et al., 2013). In hBayesDM (Ahn et al., 2017) and Dynamic Models  
57 of Choice (Heathcote et al., 2018) researchers can apply a range of models to behavior from  
58 a wide variety of decision-making paradigms ranging from choice tasks to reversal learning and  
59 inhibition tasks.

60 A common feature across all of the excellent toolboxes currently available is that they only provide  
61 optimization code to apply the DDM to data, or the DDM in addition to a few alternative models.  
62 As a consequence, the toolboxes provide no pathway for a researcher to rigorously compare  
63 the quantitative account of the DDM to alternative theories of the decision making process,  
64 including models with an urgency signal (Ditterich, 2006a), urgency-gating (Cisek et al., 2009),  
65 or collapsing bounds (Hawkins et al., 2015b). Simply put, we currently have no openly available  
66 and extensible toolbox for understanding choice and RT behavior using the many hypothesized  
67 models of decision-making. We believe there is a critical need for examining how these different  
68 models perform in terms of describing decision-making behavior.

69 The objective of this study was to address this need and provide a straightforward framework  
70 to analyze a range of existing sequential sampling models of decision-making behavior. Specif-  
71 ically, we aimed to provide an open-source and extensible framework that permits quantitative  
72 implementation and testing of novel candidate models of decision-making. The outcome of this  
73 study is *CHaRT<sub>r</sub>*, a novel toolbox in the R programming environment that can be used to analyze  
74 choice and RT data of humans and animals performing two-alternative forced choice tasks that  
75 involve perceptual or other types of decision-making. R is an open source language that enjoys  
76 widespread use and is maintained by a large community of researchers. *CHaRT<sub>r</sub>* can be used to  
77 analyze the RT and choice behavior of these observers, from the perspective of a (potentially  
78 large) range of decision-making models and can be readily extended when new models are devel-  
79 oped. These new models can be incorporated into the toolbox with minimal effort and require  
80 only basic working knowledge of R and C programming; we explain the required skills in this  
81 manuscript. Similarly, new optimization routines that are readily available as R packages can be  
82 implemented if desired.

## 83 2. Methods and Materials

84 The methods are focused on the specification of various mathematical models of decision-making,  
 85 and the parameter estimation and model selection processes. For reference, the symbols we use  
 86 to describe the models are shown in Table 1. The naming convention for the models we have  
 87 developed in *CHaRT* is to take the main architectural feature of the model and use it as a prefix  
 88 to the model. The diffusion decision model, henceforth DDM, refers to the simplest sequential  
 89 sampling model, cDDM refers to a DDM with collapsing boundaries (Hawkins et al., 2015b),  
 90 dDDM refers to a DDM with urgency signal defined by Ditterich (2006a), uDDM refers to a  
 91 DDM with a linear urgency signal, and bUGM refers to an urgency gating model (UGM) with a  
 92 linear urgency signal composed of a slope and an intercept (Thura et al., 2012).

| Parameter                    | Description                                                                                                                                                                                                                                        |
|------------------------------|----------------------------------------------------------------------------------------------------------------------------------------------------------------------------------------------------------------------------------------------------|
| $x(t)$                       | State of the decision variable at time $t$ .                                                                                                                                                                                                       |
| $dt$                         | Time step of the decision variable.                                                                                                                                                                                                                |
| $z, s_z$                     | Starting state of the decision variable (i.e., $x(0) = z$ ), and decision-to-decision variability in starting state. $s_z$ is the range of a uniform distribution with mean (midpoint) $z$ .                                                       |
| $v_i, s_v$                   | Rate at which the decision variable accumulates decision-relevant information (drift rate, $v$ ) in condition $i$ , and decision-to-decision variability in drift rate. $s_v$ is the standard deviation of a normal distribution with mean $v_i$ . |
| $\gamma(t)$                  | Urgency signal that dynamically modulates the decision variable as a function of $t$ . Can take different functional forms in different models.                                                                                                    |
| $a_{upper}, a_{lower}$       | Upper and lower response boundaries that terminate the decision process.                                                                                                                                                                           |
| $a_{upper}(t), a_{lower}(t)$ | Upper and lower response boundaries that vary as a function of $t$ .                                                                                                                                                                               |
| $T_{er}, s_t$                | Time required for stimulus encoding and motor preparation/execution (non-decision time), and decision-to-decision variability in non-decision time. $s_t$ is the range of a uniform distribution with mean (midpoint) $T_{er}$ .                   |
| $s$                          | Within-decision variability in the diffusion process. Represents the standard deviation of a normal distribution. By convention, set to a fixed value to satisfy a scaling property of the model.                                                  |
| $E(t)$                       | Momentary sensory evidence at time $t$ .                                                                                                                                                                                                           |
| $\mathcal{N}(0, 1)$          | Normal distribution with zero mean and unit variance.                                                                                                                                                                                              |
| $\mathcal{U}(l_1, l_2)$      | Uniform distribution over the interval $l_1$ and $l_2$ .                                                                                                                                                                                           |

**Table 1:** List of symbols used in the decision-making models implemented in *CHaRT*

### 93 2.1. Mathematical Models of Decision-Making

94 Sequential sampling models of decision-making assume that RT comprises two components (Rat-  
 95 cliff and McKoon, 2008; Ratcliff et al., 2016). The first component is the decision time, which  
 96 encompasses processes such as the accumulation of sensory evidence and additional decision-  
 97 related factors such as urgency. The second component is the non-decision time (or residual

98 time), which involves the time required for processes that must occur to produce a response but  
99 fall outside of the decision-formation process, such as stimulus encoding, motor preparation and  
100 motor execution time.

101 We introduce various models of the decision-making process in approximately increasing level of  
102 complexity, beginning with the simple DDM.

### 103 2.1.1. Simple Diffusion Decision Model (DDM)

104 The diffusion decision model (or DDM) is derived from one of the oldest interpretations of a  
105 statistical test – the sequential probability ratio test (Wald and Wolfowitz, 1948) – as a model of  
106 a cognitive process – how decisions are formed over time (Stone, 1960). The DDM provides the  
107 foundation for the decision-making models implemented in *CHaRTr* and assumes that decision-  
108 formation is described by a one-dimensional diffusion process (Fig. 1A) with the stochastic  
109 differential equation

$$x(t + dt) = x(t) + vdt + s\sqrt{dt}\mathcal{N}(0, 1), \quad (1)$$

110 where  $x(t)$  is the state of the decision-formation process, known as the decision variable, at time  $t$ ;  
111  $v$  is the rate of accumulation of sensory evidence, known as the drift rate;  $dt$  is the step size of the  
112 process;  $s$  is the standard deviation of the moment-to-moment (Brownian) noise of the decision-  
113 formation process;  $\mathcal{N}(0, 1)$  refers to a random sample from the standard normal distribution. A  
114 response is made when  $x(t + dt) \geq a_{upper}$  or  $x(t + dt) \leq a_{lower}$ . Whether a response is correct or  
115 incorrect is determined from the boundary that was crossed and the valence of the drift rate (i.e.,  
116  $v > 0$  implies the upper boundary corresponds to the correct response,  $v < 0$  implies the lower  
117 boundary corresponds to the correct response). In Fig. 1a, and in all DDM models in *CHaRTr*,  
118 we specify  $a_{lower} = 0$  and  $a_{upper} = A$ , without loss of generality.  $z$  represents the starting state  
119 of the evidence accumulation process (i.e., the position of the decision variable at  $x(0)$ ) and can  
120 be freely estimated between  $a_{lower}$  and  $a_{upper}$ . When we assume there is no a priori response  
121 bias,  $z$  is fixed to the midpoint between  $a_{lower}$  and  $a_{upper}$  (i.e.,  $A/2$ ). The decision time is the  
122 first time step  $t$  at which the decision variable crosses one of the two decision boundaries. The  
123 predicted RT is given as a sum of the decision time and the non-decision time  $T_{er}$ .

### 124 2.1.2. DDM with Variable Starting State, Variable Drift Rate, and Variable Non-Decision Time

125 The (simple) DDM assumes a level of constancy from one decision to the next in various com-  
126 ponents of the decision-formation process: it always commences with the same level of response  
127 bias ( $z$ ), the drift rate takes a single value ( $v_i$ , for trials in experimental condition  $i$ ), and the  
128 non-decision time never varies ( $T_{er}$ ).

129 None of these simplifying assumptions are likely to hold in experimental contexts. For example,  
130 the relative speed of correct and erroneous responses can differ, and participants' arousal may  
131 exhibit random fluctuations over time, possibly due to a level of irreducible neural noise. Decades  
132 of research into decision-making models suggests that these effects, and others, are often well

133 explained by combining systematic and random components in each of the starting state, drift  
134 rate, and non-decision time (Fig. 1B). In *CHaRTr*, we provide variants of the DDM where all of  
135 these parameters can be randomly drawn from their typically assumed distributions over different  
136 trials,

$$x_j(t + dt) = x_j(t) + v_{ij}dt + s\sqrt{dt}\mathcal{N}(0, 1) \quad (2)$$

$$x_j(0) \sim \mathcal{U}(z - \frac{s_z}{2}, z + \frac{s_z}{2}) \quad (3)$$

$$v_{ij} \sim \mathcal{N}(v_i, s_v) \quad (4)$$

$$T_{er,j} \sim \mathcal{U}(T_{er} - \frac{s_t}{2}, T_{er} + \frac{s_t}{2}) \quad (5)$$

137 where  $i$  denotes an experimental condition;  $j$  denotes an exemplar trial;  $\mathcal{U}$  denotes the uniform  
138 distribution. *CHaRTr* provides flexibility to the user such that they can assume the decision-  
139 formation process involves none, some or all of these random components. Furthermore, it  
140 provides flexibility to assume distributions for the random components beyond those that have  
141 been typically assumed and studied in the literature. For example, one could hypothesize that  
142 non-decision times are exponentially distributed rather than uniformly distributed (Ratcliff, 2013).

### 143 2.1.3. DDM with Collapsing Decision Boundaries (*cDDM*)

144 The DDM with collapsing boundaries generalizes the classic DDM by assuming that the sensory  
145 evidence required to commit to a decision is not constant as a function of elapsed decision time.  
146 Instead, it assumes that the decision boundaries gradually decrease as the decision-formation  
147 process grows longer and longer (e.g., Bowman et al., 2012; Drugowitsch et al., 2012; Hawkins  
148 et al., 2015a; Milosavljevic et al., 2010; Tajima et al., 2016). Collapsing boundaries terminate  
149 slower decisions based on weaker sensory signals (i.e., lower drift rates) at earlier time points than  
150 models with ‘fixed’ boundaries (i.e., simple DDM) and otherwise equivalent parameter settings.  
151 The net result of collapsing boundaries is a reduction in the positive skew (right tail) of the  
152 predicted RT distribution relative to the fixed boundaries DDM. This signature in the predicted  
153 RT distribution holds whether there is variability in parameters across trials (Section 2.1.2) or  
154 not (Section 2.1.1).

155 Collapsing boundaries allow the observer to implement a decision strategy where they do not  
156 commit an inordinate amount of time to decisions that are unlikely to be correct (i.e., decision  
157 processes with weak sensory signals). This allows the observer to sacrifice accuracy for a shorter  
158 decision time, so they can engage in new decisions that might contain stronger sensory signals  
159 and hence a higher chance of a correct response. When a sequence of decisions varies in signal-  
160 to-noise ratio from one trial to the next, like a typical difficulty manipulation in decision-making  
161 studies, collapsing boundaries are provably more optimal than fixed boundaries in the sense that  
162 they lead to greater predicted reward across the entirety of the decision sequence (Drugowitsch  
163 et al., 2012; Tajima et al., 2016). In this type of decision environment, collapsing boundaries  
164 have provided a better quantitative account of animal behavior, including monkeys, who might  
165 be motivated to obtain rewards to a greater extent than humans, possibly due to the operant

166 conditioning and fluid/food restriction procedures used to motivate these animals (Hawkins et  
167 al., 2015a). Whether humans also aim to maximize reward is less clear.

168 Fig. 1C shows a schematic of a collapsing boundaries model. In *CHaRTr* we assume the collaps-  
169 ing boundary follows the cumulative distribution function of the Weibull distribution, following  
170 Hawkins et al. (2015a). The Weibull function is quite flexible and can approximate many different  
171 functions that one might wish to investigate, including the exponential and hyperbolic functions.  
172 We assume the lower and upper boundaries follow the form

$$a_{lower}(t) = a \left( 1 - \exp \left( - \left( \frac{t}{\lambda} \right)^k \right) \right) \left( \frac{1}{2} - a' \right) \quad (6)$$

$$a_{upper}(t) = a - a_{lower}(t) \quad (7)$$

173 where  $a_{lower}(t)$  and  $a_{upper}(t)$  denote the position of the lower and upper boundaries at time  $t$ ;  $a$   
174 denotes the position of upper boundary at  $t = 0$  (initial boundary setting, prior to any collapse);  
175  $a'$  denotes the asymptotic boundary setting, or the extent to which the boundaries collapsed  
176 (the maximal possible collapse – where the upper and lower boundaries meet – can occur when  
177  $a' = 1/2$ );  $\lambda$  and  $k$  denote the scale and shape parameters of the Weibull distribution.

178 The collapsing boundaries are denoted in *CHaRTr* as cDDM. When the  $k$  parameter is fixed to  
179 a particular value to aid stronger identifiability in parameter estimation (Hawkins et al., 2015a),  
180 we refer to the architecture as *cfk* to denote a fixed  $k$  value, here chosen to be 3 but can be  
181 modified in user implementations.

182 The collapsing boundaries, as implemented here, are symmetric, though they need not be; *CHaRTr*  
183 provides flexibility to modify all features of the boundaries, including symmetry for each response  
184 option, and the functional form. For instance, one might hypothesize that linear collapsing  
185 boundaries are a better description of the decision-formation process than nonlinear boundaries  
186 (Murphy et al., 2016; O'Connell et al., 2018). *CHaRTr* also permits DDMs with collapsing  
187 boundaries to incorporate any combination of variability in starting state, drift rate, and non-  
188 decision time (e.g., models of the form cDDMS<sub>v</sub>S<sub>z</sub>S<sub>t</sub> and cfkDDMS<sub>v</sub>S<sub>z</sub>S<sub>t</sub>).

#### 189 2.1.4. DDM with an Urgency Signal (*uDDM*)

190 The DDM with an urgency signal assumes that the input evidence – consisting of the sensory signal  
191 and noise – is modulated by an “urgency signal”. This urgency-modulated sensory evidence is  
192 accumulated into the decision variable throughout the decision-formation process. As the process  
193 takes longer, the urgency signal grows in magnitude, implying that sensory evidence arriving  
194 later in the decision-formation process has a more profound impact on the decision-variable than  
195 information arriving earlier (Fig. 1D). To make the distinction between an urgency signal and  
196 collapsing boundaries clear, the DDM with an urgency signal assumes a dynamically modulated  
197 input signal combined with boundaries that mirror those in the classic DDM; the DDM with  
198 collapsing boundaries assumes a decision variable that mirrors the classic DDM combined with  
199 dynamically modulated decision boundaries.

200 As with the collapsing boundaries, the urgency signal can take many functional forms; we have  
 201 implemented two such forms in *CHaRTr*. The general implementation of the urgency signal is

$$E(t) = vdt + s\sqrt{dt}\mathcal{N}(0, 1) \quad (8)$$

$$x(t + dt) = x(t) + E(t)\gamma(t), \quad (9)$$

202 where  $E(t)$  denotes the momentary sensory evidence at time  $t$ ;  $\gamma(t)$  denotes the magnitude of  
 203 the urgency signal at time  $t$ . Note that with increasing decision time the urgency signal magnifies  
 204 the effect of the sensory signal ( $vdt$ ) and the sensory noise ( $s\sqrt{dt}\mathcal{N}(0, 1)$ ).

205 The first urgency signal implemented in *CHaRTr* follows a 3 parameter logistic function with two  
 206 scaling factors ( $s_x, s_y$ ) and a delay ( $d$ ), originally proposed by Ditterich (2006a):

$$S_1(t) = \exp(s_x(t - d)) \quad (10)$$

$$S_2(t) = \exp(-s_x d) \quad (11)$$

$$\gamma(t) = \frac{s_y S_1(t)}{1 + S_1(t)} + \frac{1 + (1 - s_y)S_2(t)}{1 + S_2(t)}, \quad (12)$$

207 The second form of urgency signal implemented in *CHaRTr* follows a simple, linearly increasing  
 208 function

$$\gamma(t) = b + mt, \quad (13)$$

209 where  $b$  is the intercept of the urgency signal. The slope is assumed to be  $m$ . As with the DDMs  
 210 described above, urgency signal models can incorporate any combination of variability in starting  
 211 state, drift rate and non-decision time, giving rise to a family of different decision-making models.  
 212 We also allow for the possibility of variability across decisions in the intercept term of the linear  
 213 urgency signal,

$$\gamma_j(t) = b_j + mt \quad (14)$$

$$b_j \sim \mathcal{U}(b - \frac{s_b}{2}, b + \frac{s_b}{2}), \quad (15)$$

214 where  $j$  denotes an exemplar trial, and  $b$  and  $s_b$  denote the mean (i.e., midpoint) and range of  
 215 the uniform distribution assumed for the urgency signal.

216 In *CHaRTr*, we have assumed that the urgency signal exerts a multiplicative effect on the sensory  
 217 evidence (Equation 9). One variation of urgency signal models proposed in the literature posits  
 218 that urgency is added to the sensory evidence, rather than multiplied by it (Hanks et al., 2014,  
 219 2011). In the one-dimensional diffusion models considered here, additive urgency signals make  
 220 predictions that cannot be discriminated from a DDM with collapsing boundaries (Boehm et al.,  
 221 2016). That is, for any functional form of an additive urgency signal, there is a function for the  
 222 collapsing boundaries that will generate identical predictions. For this reason we do not provide  
 223 an avenue for simulating and estimating additive urgency signal models in *CHaRTr*, and instead  
 224 recommend the use of the DDM with collapsing boundaries.



### 225 2.1.5. Urgency Gating Model (UGM)

226 In a departure from the classic DDM framework, the Urgency Gating Model (UGM) proposes  
227 there is no integration of evidence, at least not in the same form as the DDM (Cisek et al., 2009;  
228 Thura et al., 2012; Thura and Cisek, 2014). Rather, the UGM assumes that incoming sensory  
229 evidence is low-pass filtered, which prioritizes recent over temporally distant sensory evidence,  
230 and this low-pass filtered signal is modulated by an urgency signal that increases linearly with  
231 time (Equation 13).

232 Implementation of the UGM in *CHaRTr* uses the exponential average approach for discrete low-  
233 pass filters (smoothing). The momentary evidence for a decision is a weighted sum of past and  
234 present evidence, which gives rise to the UGM's pair of governing equations

$$\alpha = \frac{\tau}{\tau + dt} \quad (16)$$

$$E(t) = \alpha E(t-1) + (1 - \alpha)(vdt + s\sqrt{dt}\mathcal{N}(0, 1)), \quad (17)$$

235 where  $\tau$  is the time constant of the low-pass filter, which has typically been set to relatively  
236 small values of 100 or 200 ms in previous applications of the UGM, and  $\alpha$  controls the amount  
237 of evidence from previous time points that influences the momentary evidence at time  $t$ . For  
238 instance, when  $\alpha = 0$  there is no low-pass filtering, and when  $\tau = 100ms$  (and  $dt$  is 1 ms) the  
239 previous evidence is weighted by 0.99 and new evidence by 0.01.

240 The decision variable at time  $t$  is now given as

$$\gamma(t) = b + mt \quad (18)$$

$$x(t) = E(t)\gamma(t). \quad (19)$$

241 The intercept and slope of the urgency signal are set to particular values in standard applications  
242 of the UGM ( $b = 0$ ,  $m = 1$ ), reducing equation 19 to

$$x(t) = E(t)t. \quad (20)$$

243 In *CHaRTr*, we allow for variants of the UGM where the parameters of the urgency signal are  
244 not fixed. For instance, similar to the DDM with an urgency signal, we can test a UGM where  
245 the intercept ( $b$ ) is freely estimated from data (bUGM), and even an intercept that varies on a  
246 trial-by-trial basis (Equation 14).

## 247 2.2. Fitting Models to Data: Parameter Estimation and Model Selection

### 248 2.2.1. Parameter Estimation

249 In *CHaRTr*, we estimate parameters for each model and participant independently, using Quantile  
250 Maximum Products Estimation (QMPE; Heathcote and Brown, 2004; Heathcote et al., 2002).

251 QMPE uses the QMP statistic, which is similar to  $\chi^2$  or multinomial maximum likelihood esti-  
252 mation and quantifies agreement between model predictions and data by comparing the observed  
253 and predicted proportions of data falling into each of a set of inter-quantile bins. These bins are  
254 calculated separately for the correct and error RT data. In all examples that follow, we use 9  
255 quantiles calculated from the data (i.e., split the RT data into 10 bins), though the user can spec-  
256 ify as many quantiles as they wish. Generally speaking, we recommend no fewer than 5 quantiles,  
257 to prevent loss of distributional information, and no more than approximately 10 quantiles, to  
258 prevent noisy observations in observed data especially at the tails of the distribution potentially  
259 bearing undue influence on the parameter estimation routine.

260 Many of the models considered in *CHaRTr* have no closed-form analytic solution for their pre-  
261 dicted distribution. To evaluate the predictions of each model, we simulate 10,000 Monte Carlo  
262 replicates per experimental condition during parameter estimation. Once the parameter search  
263 has terminated, we use 50,000 replicates per experimental condition to precisely evaluate the  
264 model predictions and perform model selection. In *CHaRTr*, the user can vary the number of  
265 replicates used for parameter estimation and model selection; in previous applications, we have  
266 found these default values provide an appropriate balance between precision of the model pre-  
267 dictions and computational efficiency. To simulate the models, we use Euler's method, which  
268 approximates the models' representation as stochastic differential equations.

269 Alternatives to our simulation-based approach exist, such as the integral equation methods of  
270 Smith (2000) or others that use analytical techniques to calculate first passage times (Gondan  
271 et al., 2014; Navarro and Fuss, 2009), to generate exact distributions. We do not pursue those  
272 methods in *CHaRTr* owing to the model-specific implementation required, which is inconsistent  
273 with *CHaRTr*'s core philosophy of allowing the user to rapidly implement a variety of model  
274 architectures.

275 We estimate the model parameters using differential evolution to optimize the goodness of fit  
276 (DEoptim package in R, Mullen et al., 2011). For the type of non-linear models considered  
277 in *CHaRTr*, we have previously found that differential evolution more reliably recovers the true  
278 data generating model than particle swarm and simplex optimization algorithms (Hawkins et al.,  
279 2015a). DEoptim also allows easy parallelization and can be used readily in the cloud with large  
280 number of cores to speed the process of model estimation. However, we again provide flexibility  
281 in this respect; the user can change this default setting and specify their preferred optimization  
282 algorithm/s.

### 283 2.2.2. Model Selection

284 *CHaRTr* provides two metrics for quantitative comparison between models. Each metric is based  
285 on the maximized value of the QMP statistic, which is a goodness-of-fit term that approximates  
286 the continuous maximum likelihood of the data given the model.

287 The DDM is a special case of the model variants considered and will almost always fit more  
288 poorly than any of the other variants. We provide model selection methods that determine if

289 the incorporation of additional components such as urgency or collapsing bounds provide an  
290 improvement in fit that justifies the increase in model complexity.

291 The raw QMP statistic, as an approximation to the likelihood, can be used to calculate the Akaike  
292 Information Criterion (Akaike, 1974, AIC) and the Bayesian Information Criterion (Schwarz, 1978,  
293 BIC). We provide methods to compute AIC and BIC owing to the differing assumptions underlying  
294 the two information criteria (Aho et al., 2014), and differing performance with respect to the  
295 modeling goal (Evans, in press).

296 *CHaRT* also provides functionality to transform the model selection metrics into model weights,  
297 which account for uncertainty in the model selection procedure and aid interpretation by transfor-  
298 mation to the probability scale. The weight  $w$  for model  $i$ ,  $w(M_i)$ , relative to a set of  $m$  models,  
299 is given by

$$w(M_i) = \frac{\exp(-\frac{1}{2}Z(M_i))}{\sum_{j=1}^m \exp(-\frac{1}{2}Z(M_j))}, \quad (21)$$

300 where  $Z$  is AIC, BIC, or the deviance ( $-2 \times \log$ -likelihood; that is,  $-2 \times$  QMP statistic). The  
301 model weight is interpreted differently depending on the metric  $Z$ :

- 302 • Where  $Z$  is the log-likelihood, the model weights are relative likelihoods.  $Z$  should only  
303 be used in the model weight transformation when all models under consideration have the  
304 same number of freely estimated parameters.
- 305 • Where  $Z$  is the AIC, the model weights become Akaike weights (Wagenmakers and Farrell,  
306 2004).
- 307 • Where  $Z$  is the BIC, and the prior probability over the  $m$  models under consideration is  
308 uniform (i.e., each model is assumed to be equally likely before observing the data), the  
309 model weights approximate posterior model probabilities ( $p(M|Data)$ , Wasserman, 2000).

### 310 2.2.3. Visualization: Quantile Probability Plots

311 Visualization of choice and RT data is critical to understanding observed and predicted behavior.  
312 Such visualization can prove challenging in studies of rapid decision-making because each cell  
313 of the experimental design (e.g., a particular stimulus difficulty) yields a joint distribution over  
314 the probability of a correct response (accuracy) and separate RT distributions for correct and  
315 error responses. Since most decision-making tasks manipulate at least one experimental factor  
316 across multiple levels, such as stimulus difficulty, each data set is comprised of a family of joint  
317 distributions over choice probabilities and pairs of RT distributions (correct, error). Following  
318 convention and recommendation (Ratcliff and McKoon, 2008; Ratcliff et al., 2016), we visualize  
319 these joint distributions with quantile probability (QP) plots. QP plots are a compact form to  
320 display choice probabilities and RT distributions across multiple conditions.

321 In a typical QP plot, quantiles of the RT distribution of a particular type (e.g., correct responses)  
322 are plotted as a function of the proportion of responses of that type. For example, consider a

323 hypothetical decision-making experiment with three different levels of stimulus difficulty; Fig. 2  
324 provides a plausible example of the data from such an experiment. Now assume that for one  
325 of the experimental conditions, the accuracy of the observer was 55%. To display the choice  
326 probabilities, correct RTs and error RTs for this condition, the QP plot shows a vertical column  
327 of  $N$  markers above the  $x$ -axis position  $\sim 0.55$ , where the  $N$  markers correspond to the  $N$   
328 quantiles of the RT distribution of correct responses (rightmost gray bar in Fig. 2). The QP plot  
329 also shows a vertical columns of  $N$  markers at the position  $1 - 0.55 = 0.45$ , where this set of  
330  $N$  markers correspond to the  $N$  quantiles of the distribution of error RTs (leftmost gray bar in  
331 Fig. 2). This means that RT distributions shown to the right of .5 on the  $x$ -axis reflect correct  
332 responses, and those to the left of .5 on the  $x$ -axis reflect error responses.

333 The default *CHaRTr* QP plot display 5 quantiles of the RT distribution: 0.1, 0.3, 0.5, 0.7 and  
334 0.9 (sometimes also referred to as five percentiles: 10<sup>th</sup>, 30<sup>th</sup>, 50<sup>th</sup>, 70<sup>th</sup>, 90<sup>th</sup>). The .1 quantile  
335 summarizes the leading edge of the RT distribution, the .5 quantile (median) summarizes the  
336 central tendency of the RT distribution, and the .9 quantile summarizes the tail of the RT  
337 distribution. The goal of visualization with QP plots, or other forms of visualization, is to enable  
338 comparison of the descriptive adequacy of a model's predictions relative to the observed data.

### 339 3. Results

340 The results section first provides guidance on the use of *CHaRTr* and how to apply the various  
341 models of the decision-making process to data. The second part of the results section illustrates  
342 the use of *CHaRTr* to analyze RT and choice data from hypothetical observers, followed by a  
343 case study modeling data from two non-human primates (Roitman and Shadlen, 2002). Code for  
344 the *CHaRTr* toolbox is available at [chartr.chandlab.org/](http://chartr.chandlab.org/) and will eventually be released  
345 as an R library.

#### 346 3.1. Toolbox flow

347 Fig. 3 and Fig. 4 provide flowcharts for *CHaRTr*. Fig. 3 provides an overview of the five main  
348 steps involved in the cognitive modeling process. Fig. 4 provides a schematic overview of the  
349 steps involved in the parameter estimation component of the process, which uses the differential  
350 evolution optimization algorithm (Mullen et al., 2011).

351 The typical steps in *CHaRTr* for estimating the parameters of a decision-making model from data  
352 are as follows:

- 353 Step 1: **Model Specification:** Specify models in the C programming language, and compile the  
354 C code to create the shared object, `chartr-modelspec.so`, that is dynamically loaded into  
355 the R workspace. Future versions of *CHaRTr* will use the Rcpp framework and will not  
356 require the compilation and loading of shared objects (Eddelbuettel and François, 2011).
- 357 Step 2: **Formatting and Loading Data:** Convert raw data into an appropriate format (choice  
358 probabilities, quantiles of RT distributions for correct and error trials). Save this data object

359 for each unit of analysis (e.g., a participant, different experimental conditions for the same  
360 participant). Load this data object into the R workspace.

361 **Step 3: Parameter Specification:** Choose the parameters of the desired model that need to be  
362 estimated along with lower and upper boundaries on those parameters (i.e., the minimum  
363 and maximum value that each parameter can feasibly take).

364 **Step 4: Parameter Estimation:** Pass the parameters, model and data to the optimization algo-  
365 rithm (differential evolution). The algorithm iteratively selects candidate parameter values  
366 and evaluates their goodness of fit to data. This process is repeated until the goodness of  
367 fit no longer improves (Fig. 4).

368 **Step 5: Model Selection:** The parameter estimates from the search termination point (i.e., the  
369 point where goodness of fit no longer improves), the corresponding goodness of fit statistics  
370 and model predictions are saved for subsequent model selection and visualization.

371 These 5 steps are repeated for each model and each participant under consideration. In the next  
372 few sections, we elaborate on each of the steps with examples to illustrate their implementation  
373 in *CHaRTr*. We note that use of *CHaRTr* requires a basic knowledge of R programming, and if  
374 one wishes to design and test a new decision-making model then also C programming. Owing to  
375 the many excellent online resources for both languages (a simple search of “R program tutorial”  
376 will return many helpful results), we do not provide a tutorial for either language here.

### 377 3.1.1. Model Specification

378 The difference equation for the model variants implemented in *CHaRTr* is specified in C code in  
379 the file "chartr-ModelSpec.c". An example implementation of the DDM (Section 2.1.1) is shown  
380 in Listing 1. The functions take as input the various parameters that are to be optimized along  
381 with various constants such as the maximum number of time points to simulate as well as the  
382 time step.

```
383 // Simple Diffusion Decision Model (DDM)  
384 int DDM(double *z, double *v, double *aL, double *aU, double *s, double *dt,  
385         double *response, double *rt, double *n, double *maxTimeStep)  
386 {  
387     /*  
388         z - starting point  
389         aL - lower bound  
390         aU - upper bound  
391         v - drift rate  
392         response - response from the function  
393         rt - reaction time of the animal  
394         n - number of trials to simulate  
395         maxTimeStep - number of time steps  
396         dt = stepsize (for time usually 0.001 s, or 1 ms depending on model)  
397         s = standard deviation of noise, usually fixed as a scaling parameter  
398     */  
399     .  
400     */  
401     double rhs, x;  
402     int N, i, timeStep, MaxTimeStep;  
403
```

```
404 /* Convert some double inputs to integer types. */
405 N=(int) *n;
406 MaxTimeStep =(int) *maxTimeStep;
407 GetRNGstate();
408 rhs=sqrt(*dt)*(*s);
409 for (i=0;i<N;i++) // For each trial in the list of simulated trials
410 {
411     x=*z;
412     timeStep=0;
413     response[i]=(double) -1.0 ;
414     do
415     {
416         timeStep = timeStep+1;
417         x = x+(*dt)*(*v)+rhs*norm_rand();
418         if (x>=*aU) {
419             response[i]=(double) 1.0;
420             break ;
421         }
422         if (x<=*aL) {
423             response[i]=(double) 2.0 ;
424             break ;
425         }
426     } while (timeStep < MaxTimeStep) ;
427     rt[i]=((double) timeStep)*(*dt) - (*dt)/((double) 2.0);
428 }
429 PutRNGstate();
430 }
431 }
```

**Listing 1:** Source code for a function in C that implements the difference equation for the DDM.

433 Once the C code has been specified for the model, the code is compiled using the following  
434 command that uses the SHLIB framework (R Core Team) at the terminal (usually ITERM in mac,  
435 Terminal Emulator in linux). The command shown in Listing 2 calls the appropriate compiler  
436 (clang on mac, gcc on linux), identifies the appropriate compiler to run, and loads the appropriate  
437 libraries and ensures the correct options are applied during compilation to create the architecture  
438 specific shared object.

```
439 $ R CMD SHLIB chartr-ModelSpec.c
440
```

**Listing 2:** Creating a shared library for loading the specified models into R.

442 The typical output of the command when run successfully on Linux is shown in Listing 3. The  
443 output of the compilation is a shared object called *chartr-modelspec.so* that is dynamically loaded  
444 into R for use with the differential evolution optimizer.

```
445 gcc -std=gnu99 -I/usr/share/R/include -DNDEBUG -fpic -g -O2 -fstack-protector-
446 strong -Wformat -Werror=format-security -Wdate-time -D_FORTIFY_SOURCE=2 -g
447 -c chartr-ModelSpec.c -o chartr-modelspec.o
448
449 g++ -shared -L/usr/lib/R/lib -Wl,-Bsymbolic-functions -Wl,-z,relro -o chartr-
450 ModelSpec.so chartr-ModelSpec.o -L/usr/lib/R/lib -lR
451
```

**Listing 3:** Output from the compilation of the command in Listing 2.

```
condition, response, RT
90, 1, 0.573
90, 1, 0.472
90, 1, 0.556
.
.
.
90, 0, 0.406
90, 0, 0.429
90, 0, 0.57
```

**Listing 4:** The required raw data format for parameter estimation in *CHaRT<sub>r</sub>*.

```
dataDir="Example2" # directory name of data files to fit
subjnam="Subj1"
load(paste(dataDir, "/", subjnam, sep=""))
```

**Listing 5:** Loading data for "Subj1" for model estimation.

453 We anticipate that future versions of *CHaRT<sub>r</sub>* will use the Rcpp framework (Eddelbuettel and  
454 François, 2011), which will obviate the need for compiling and loading shared object libraries.

### 455 3.1.2. Formatting and Loading Data

456 To estimate the parameters of decision-making models in *CHaRT<sub>r</sub>*, the data need to be organized  
457 in a separate comma separated values (CSV) file for each participant in a simple three column  
458 format: "condition, response, RT". "condition" is typically a stimulus difficulty parameter,  
459 "response" is correct (1) or incorrect (0), and RT is the response time (or reaction time when  
460 response time and movement can be separated). For example, in a typical file, data for a single  
461 stimulus difficulty (e.g., one level of motion coherence in a random dot kinematogram) would  
462 look like Listing 4.

463 The raw data are converted in "chartr-processRawData.r" to generate 9 quantiles (10 bins) of  
464 correct and error RTs to be used in the parameter estimation process. It also stores the data as  
465 a R list named *dat*, which includes four fields: *n*, *p*, *q*, *pb*.

- 466 • *n* is the number of correct and error responses in each condition.
- 467 • *p* is the proportion of correct responses in each condition (derived from *n*).
- 468 • *q* is the quantiles of the correct and error RT distributions in each condition.
- 469 • *pb* is the number of responses in each bin of the correct and error RT distributions in each  
470 condition (derived from *n*).

471 *dat* is saved to disk as a new file. The *dat* file is loaded into the R workspace as required for the  
472 model estimation procedure. Listing 5 shows R code for loading RT and choice data, as stored  
473 in *dat*, for a given participant.

### 474 3.1.3. Parameter Specification

475 The next step in model estimation is, for each model, to specify a list of parameters that can be  
476 freely estimated from data along with each parameter's lower and upper bound; we provide default  
477 suggestions for the lower and upper boundaries in *CHaRTr*. Model parameters can be generated by  
478 calling the function *paramsandlims* with two arguments: model name and the number of stimulus  
479 difficulty levels in the experiment. The number of stimulus difficulties is internally converted into  
480 drift rate parameters; for example, if there are  $n$  stimulus difficulties, then *paramsandlims* will  
481 estimate  $n$  independent drift rate parameters. There is also functionality in *CHaRTr* to specify  
482 fixed (non-estimated) values of some parameters, such as a drift rate of 0 for conditions with non-  
483 informative sensory information (e.g., 0% coherence in a random dot kinematogram experiment).  
484 *paramsandlims* returns a named list with the following fields: lowers, uppers, parnames, fitUGM.  
485 These variables are used internally in the parameter estimation routines.

### 486 3.1.4. Parameter Estimation

487 Steps 1–3 loaded the required data, identified the desired model to fit and specified the parameters  
488 of the model to be estimated. This information is now passed to the optimization algorithm  
489 (differential evolution). Parameter optimization is an iterative process of proposing candidate  
490 parameter values, accepting or rejecting candidate parameter values based on their goodness of  
491 fit, and repeating. This process continues until the proposed parameter values no longer improve  
492 the model's goodness of fit. These are assumed to be the best-fitting parameter values, or the  
493 (approximate) maximum likelihood estimates. Fig. 4 provides an overview of the steps involved  
494 in parameter estimation when using the differential evolution optimization algorithm (Mullen et  
495 al., 2011).

496 The accompanying file "chartr-DemoFit.r" provides a complete code example for estimating the  
497 parameters of a model with urgency.

### 498 3.1.5. Model Selection

499 Once the best-fitting parameters have been estimated from a set of candidate models, the final  
500 step is to use this information to guide inference about the relative plausibility of each of the  
501 models given the data. Many different levels of questions can be asked of these models. The  
502 best practices for model selection are described generally in Aho et al. (2014) and for the specific  
503 problem of behavioral modeling in Heathcote et al. (2015).

504 In *CHaRTr*, we provide functions for converting from the raw QMP statistic that approximates the  
505 likelihood. The likelihood provides essentially a goodness-of-fit statistic that can be combined  
506 with penalized model comparison metrics. This could entail comparison between two models  
507 at multiple levels of granularity. For instance, the question could be, "which of the models  
508 considered provides the better description of the data", or "is a DDM with variable baseline  
509 better than a DDM without a variable baseline". It could also be used to compare between a



---

```
# In this implementation - the variability in drift rate and baseline are
  modeled using C code, the randomness in the St parameter is handled by R
DDMSvSzSt={
  out=.C("DDMSvSz",zmin=zmin,zmax=zmax,v=v,aU=aU,aL=aL,eta=eta,s=stoch.s,
        dt=dt,response=resps,rt=rts,n=nmc,maxTimeStep=maxTimeStep);
  rts=out$rt+runif(n=nmc,min=Ter-st0/2,max=Ter+st0/2);
},
```

---

**Listing 6:** R Code for estimating the RTs and choice for the model DDM  $S_v S_z S_t$

510 model with collapsing boundaries and a model with drift-rate variability (O’Connell et al., 2018)  
511 or between models with different forms of collapsing boundaries (Hawkins et al., 2015a). All of  
512 these questions can be answered using *CHaRTr*. As a guide, we provide illustrations of model  
513 selection analyses using *CHaRTr* in two case studies presented in Section 3.4. We also apply the  
514 model selection analyses to the behavior of monkeys performing a decision-making task (Roitman  
515 and Shadlen, 2002).

### 516 3.2. Extending CHaRTr

517 *CHaRTr* is designed with the goal of being readily extensible, to allow the user to specify new  
518 models with minimal development time. This allows the user to focus on the models of scientific  
519 interest while *CHaRTr* takes care of the model estimation and selection details behind the scenes.  
520 Here, we provide an overview of the steps required to add new models to *CHaRTr*.

- 521 1. Add a new function to “chartr-ModelSpec.c” with the parameters needed to be estimated  
522 for the model. Specify the model in C code, similar to Listing 1. Provide the new model  
523 with a unique name (i.e., not shared with any other models in the toolbox), preferably using  
524 the convention we defined above.
- 525 2. Add any new parameters of the model to the function *makeparamlist*, and to the *param-*  
526 *sandlims* function in script “chartr-HelperFunctions.r”.
- 527 3. Add the name of the model to the function *returnListOfModels*, in script “chartr-HelperFunctions.r”.
- 528 4. Make sure additional parameters are passed to the functions *diffusionC* and *getpreds*, in  
529 scripts “chartr-HelperFunctions.r” and “chartr-FitRoutines.r”, respectively.
- 530 5. Finally, specify in function *diffusionC* the code for generating RTs and responses to use for  
531 model fitting. For example, the code for generating the RTs and responses for  $DDMS_v S_z S_t$   
532 is shown in the Listing 6

### 533 3.3. Simulating Data from Models in CHaRTr

534 Once models are specified, they can be used to generate simulated RTs and discrimination accu-  
535 racy for each condition. Simulated data help refine quantitative hypotheses. They also provide  
536 much greater insight into the dynamics of different decision-making models and how different  
537 variables in these models modulate the predicted RT distributions for correct and error trials  
538 (Ratcliff and McKoon, 2008).

539 *CHaRTr* provides straightforward methods to simulate data from decision-making models and  
540 generate quantile probability plots to compactly summarize and visualize RT distributions and  
541 accuracy. The function *paramsandlims*, used above in the parameter estimation routine, can also  
542 be used to generate hypothetical parameters to be passed to the function *simulateRTs*, which  
543 generates a set of simulated RTs and choice responses. By hypothetical parameters, we mean a  
544 set of reasonable starting values. An example is shown in Listing 7. These parameters can be  
545 changed by the user.

---

```
546 source("chartr-HelperFunctions.r")  
547 nCoh = 5  
548 nmc = 50000  
549 model = "DDM"  
550 fP = paramsandlims(model, nCoh, hypoPars = TRUE)  
551 currParams = fP$hypoParams  
552 R = simulateRTs(model, currParams, n=nmc, nds=nCoh)
```

---

**Listing 7:** R code for simulating RT and choice responses from the simple diffusion decision model (DDM).

555 **Fig. 5** shows the output of "chartr-Demo.r", which simulates and visualizes choice and RT  
556 data from four models in *CHaRTr*: DDM, DDMS<sub>v</sub>S<sub>z</sub>S<sub>t</sub>, UGMS<sub>v</sub>, and dDDMS<sub>v</sub>. **Fig. 5A** shows  
557 predictions of the simple DDM (see Section 2.1.1), a symmetric, inverted-U shaped QP plot  
558 (Ratcliff and McKoon, 2008); the symmetry implies that correct and error RTs are identically  
559 distributed. As variability is introduced to the DDM's starting state ( $S_z$ ) and/or drift-rate ( $S_v$ ;  
560 see Section 2.1.2), the QP plot loses its symmetry (**Fig. 5B**); relative to correct RTs, error RTs  
561 can be faster (due to  $S_z$ ) or slower (due to  $S_v$ ). **Fig. 5B** also introduced variability in non-decision  
562 time ( $S_t$ ), which increases the variance of the fastest responses.

563 **Fig. 5C** shows predictions of a standard variant of the UGM model (UGMS<sub>v</sub>) that assumes variable  
564 drift rate, zero intercept, a slope ( $\beta$ ) of 1 and a time constant of 100 ms (see Section 2.1.5). The  
565 urgency gating mechanism in this model reduces the positive skew of the RT distributions, and  
566 leads to the prediction that error RTs are always slower than correct RTs (**Fig. 5C**; Hawkins et  
567 al., 2015b). Like the UGM, the dDDMS<sub>v</sub> model, another model of urgency (see Section 2.1.4),  
568 also predicts reduced positive skew of the RT distributions. Unlike the standard UGM, however,  
569 it can also predict error RTs that are faster or slower than correct RTs (**Fig. 5D**).

570 It is clear from **Fig. 5** that various features in data discriminate between various features of the  
571 decision-making models: the relative speed of correct and error RTs, and critically the shape of  
572 complete RT distributions. We now provide three illustrative case studies that take advantage of  
573 the differential predictions of the models, demonstrating the use of *CHaRTr* for model parameter  
574 estimation and selection amongst sets of competing models.

### 575 3.4. Case Studies

576 To illustrate the utility of the toolbox, we provide three case studies where we simulated data  
577 from decision-making models in *CHaRTr* (case studies 1 and 2) or use *CHaRTr* to model data

578 collected from monkeys performing a decision-making task (case study 3). We use the case  
579 studies to demonstrate the typical model estimation and selection analyses. The case studies  
580 also provide a test of model and parameter recovery. That is, whether *CHaRTr* reliably selects  
581 the true data-generating model, and whether it reliably estimates the parameters of the true  
582 data-generating model.

### 583 3.4.1. Case Study 1: Hypothetical Data Generated from a DDM with Variable Drift Rate and 584 Non-Decision Time ( $DDMS_{vS_t}$ )

585 For our first case study we assumed the data came from hypothetical observers who made decisions  
586 in a manner consistent with a DDM with variable drift rate ( $S_v$ ) and variable start times ( $S_t$ ). In  
587 *CHaRTr*, this corresponds to simulating data from the model  $DDMS_{vS_t}$ , where an observer's RTs  
588 exhibit variability due to both the decision-formation process and the non-decision components.  
589 We simulated 300 trials for each of 5 stimulus difficulties, for 5 hypothetical participants.

590 For each model and hypothetical participant, we repeated the parameter estimation procedure 5  
591 times, independently. We heavily recommend this redundant-estimation approach as it greatly  
592 reduces the likelihood of terminating the optimization algorithm in local minima, which can  
593 arise in simulation-based models like those implemented in *CHaRTr*. Variability occurs due to  
594 randomness in simulating predictions of the model at each iteration of the optimization algorithm,  
595 and randomness in the optimization algorithm itself (for similar approach, see Hawkins et al.,  
596 2015a,b). We then select the best of the 5 independent parameter estimation procedures (or  
597 'runs') for each model and participant (i.e., the 'run' with the highest value of the QMP statistic).  
598 If computational constraints are not an issue, then we encourage as many repetitions as possible  
599 of the parameter estimation procedure.

600 **Fig. 6A** shows the BICs for a set of models, obtained after using *CHaRTr* to fit the RT and  
601 choice data from one of the hypothetical observers. All the BICs are reported with reference to  
602 the DDM (i.e., as difference scores relative to the DDM). Thus, negative values of the BIC score  
603 suggest a more parsimonious account of the data than the DDM, and positive values suggest the  
604 opposite.

605 **Fig. 6B** shows the BIC-based approximate posterior model probabilities (Eq. 21) for the top six  
606 models.  $DDMS_{vS_t}$  provided the best account of the data; by 'best account', we mean the model  
607 that provided the most appropriate tradeoff between model fit and model complexity among the  
608 specific set of models under consideration, according to BIC. This suggests that *CHaRTr* can  
609 successfully identify the data-generating model – a necessary test for any parameter estimation  
610 and model selection analysis. We strongly recommend this form of *model recovery* analysis when  
611 developing and testing any proposed cognitive model; if a candidate model cannot be successfully  
612 identified in simulated data, where the true model is known, it will not be useful a model for real  
613 data.

614 The models *CHaRTr* ranked 2<sup>nd</sup> to 6<sup>th</sup> were sensibly related to the data-generating model. These  
615 models all assumed that observed RTs were influenced by factors other than sensory evidence

616 (such as growing impatience), which might mimic the data-generating model's RT variability  
617 that arose due to factors external to the decision-formation process (variable non-decision time).  
618 Although these results indicate that the  $DDMS_{vS_t}$  model provided a better account of the data  
619 than  $cfkDDMS_{vS_t}$ ,  $dDDMS_{vS_t}$ ,  $cDDMS_{vS_t}$ , and  $DDMS_{vS_zS_t}$ , they also serve as an important  
620 reminder that model selection should not be used to argue for the "best" model in an absolute  
621 sense. Rather, it is often most constructive to rank useful hypotheses/explanations about the  
622 data that can then guide further study (Burnham et al., 2011), which is the approach we have  
623 used here.

624 Fig. 6C shows the estimated parameter values for the best-fitting  $DDMS_{vS_t}$  model. The pa-  
625 rameter estimates were very similar to the data-generating values, with some minor over- or  
626 under-estimation of the drift rate parameters. This suggests that *CHaRTr* can reasonably re-  
627 cover the data-generating model *and* parameters. As above, we also strongly recommend this  
628 form of *parameter recovery* analysis when developing and testing any proposed cognitive model.

629 Fig. 6D and Fig. 6E show the model selection outcomes from another hypothetical observer.  
630 The best fitting model is again identified as  $DDMS_{vS_t}$ . A few other models also provided good  
631 accounts of the data. As was the case for observer 1, these models predict variability in RTs due  
632 to mechanisms outside the decision-formation process.

633 In the three other hypothetical observers that we simulated, the pattern of results returned  
634 by *CHaRTr* was consistent with the results shown for the two hypothetical observers in Fig.  
635 6:  $DDMS_{vS_t}$  was chosen as the best fitting model for all observers. If we assume the set of  
636 observers are independent (which they are in the case of our hypothetical example and usually  
637 in experiments), we can average over their posterior model probabilities to obtain a group-level  
638 estimate. As shown in Fig. 6F,  $DDMS_{vS_t}$  is identified as the most plausible model for the data  
639 across the set of observers, indicating good model recovery.

640 Fig. 7 shows QP plots of the data from two hypothetical observers overlaid on the predictions  
641 from a range of models. The simple DDM predicted larger variance than was observed in data,  
642 and therefore provided a poor account of the data. When the DDM is augmented with  $S_v$  and  
643  $S_t$ , it provided a much improved account of the data, capturing most of the RT quantiles and  
644 the accuracy patterns. Three other models provided an almost-equivalent account of the data in  
645 terms of log-likelihoods ( $DDMS_{vS_zS_t}$ ,  $cDDMS_{vS_t}$ ,  $dDDMS_{vS_t}$ ), but they did so with the use of  
646 more model parameters than  $DDMS_{vS_t}$ . This led to a larger complexity penalty for those models  
647 and thus larger BICs in comparison to the  $DDMS_{vS_t}$  model, as shown in the model selection  
648 analysis in Fig. 6.

#### 649 3.4.2. Case Study 2: Hypothetical Data Generated from a UGM with Variable Intercept ( $bUGMS_v$ )

650 In a second case study we simulated data from hypothetical observers whose decision-formation  
651 process was controlled by an urgency gating model (UGM) with a variable drift rate and an  
652 intercept (Cisek et al., 2009; Thura et al., 2012), termed  $bUGMS_v$  in *CHaRTr*. We again assumed  
653 five hypothetical subjects, five stimulus difficulties and simulated 500 trials for each of them. We

654 then fit the data with the redundant-estimation approach as in case study 1 and evaluated the  
655 results of the model selection analysis, all using routines contained in *CHaRTr*.

656 **Fig. 8A** shows the BICs for the set of models considered for one hypothetical observer's data,  
657 again referenced to the DDM (i.e., as difference scores relative to the DDM). Negative values  
658 of the BIC score suggest a more parsimonious account of the data than the DDM, and positive  
659 values suggest the opposite. **Fig. 8B** shows the BIC weights (Eq. 21) for the top six models.  
660  $\text{bUGMS}_v$  provided the best account of the data for this hypothetical observer. The models  
661 *CHaRTr* ranked 2<sup>nd</sup> to 6<sup>th</sup> were also sensibly related to the data-generating model; they all  
662 assumed the decision-formation process was influenced by factors other than sensory evidence,  
663 such as growing impatience. The second case study reaffirms our conclusion from the first case  
664 study that model selection may not be put to best use when arguing for a single "best" model  
665 in an absolute sense. This is especially true when the data-generating model is not decisively  
666 recovered from data.

667 Model selection sometimes fails to recover the data-generating model. **Fig. 8C** shows the top six  
668 models identified by *CHaRTr* as providing the best fit to another of the hypothetical observers'  
669 data;  $\text{uDDMS}_v$  provided a better fit than the generative model  $\text{bUGMS}_v$ . This result highlights  
670 two important points. First, some models under some circumstances can mimic each other (i.e.,  
671 generate similar predictions), which makes their identification in data difficult. Second, some  
672 models may not be mimicked, but they may require very many data points to reliably recover.  
673 We note that these points are not specific to *CHaRTr* – they are properties of quantitative model  
674 selection in general and are an important reminder of the necessary careful steps needed when  
675 aiming to select between models (Chandrasekaran et al., 2018).

676 **Fig. 8D** shows the posterior model probabilities for the different models averaged over all five  
677 observers considered. Reassuringly, the most plausible model across the set of observers is the  
678 generative model  $\text{bUGMS}_v$ . The next five best models are all conceptually related to the data  
679 generating model. For instance, the next best model was  $\text{UGMS}_v$  which is an urgency gating  
680 model with no intercept. The third best model was  $\text{uDDMS}_v$  which is a DDM model with urgency  
681 but no gating. Together these results again serve as a reminder of the utility of *CHaRTr* in the  
682 analysis of decision-making models, including the ability to quantitatively assess a large set of  
683 conceptually similar and dissimilar models.

### 684 3.4.3. Case Study 3: Behavioral Data From Monkeys Reported in Roitman and Shadlen (2002)

685 To demonstrate the utility of *CHaRTr* in understanding experimental data, we use *CHaRTr* to  
686 model the freely available RT and choice data from two monkeys performing a random-dot motion  
687 RT decision-making task (Roitman and Shadlen, 2002). In this classic variant of the random-  
688 dot motion task, the monkeys were trained to report the direction of coherent motion with eye  
689 movements. The percentage of coherently moving dots was randomized from trial to trial across  
690 six levels (0%, 3.2%, 6.4%, 12.8%, 25.6% and 51.2%). Monkey b completed 2614 trials and  
691 Monkey n completed 3534 trials.

692 We demonstrate that *CHaRTr* replicates key findings from past analyses of these behavioral data.  
693 Roitman and Shadlen (2002)'s behavioral (and neural) data were originally interpreted as a neural  
694 correlate of the DDM. Later studies suggested a stronger role for impatience/urgency in these  
695 data (Ditterich, 2006b; Hawkins et al., 2015b). This is the first result we wish to demonstrate  
696 again using *CHaRTr*. Second, Hawkins et al. (2015a) showed that the urgency gating model  
697 provides a better description of the data than the DDM. We note that recent work suggests the  
698 evidence for impatience/urgency in Roitman and Shadlen (2002)'s data might be the result of  
699 the particular training regime the monkeys were exposed to (Evans and Hawkins, 2019).

700 **Fig. 9A-B** shows the results from *CHaRTr*. For both monkeys, the four best-performing models  
701 all included a DDM with either urgency or collapsing bounds, and the worst performing models  
702 were largely DDM models without any forms of urgency. As mentioned above, for any functional  
703 form of a collapsing boundary there is a form of additive urgency signal that can generate identical  
704 predictions. So finding that collapsing bound models describe the data better is consistent with  
705 prior observations that urgency is an important factor. Together, the results are broadly consistent  
706 with those of Ditterich (2006a) and Hawkins et al. (2015b) who reported that models with forms  
707 of impatience are systematically better than models without it, for Roitman and Shadlen (2002)'s  
708 data. **Fig. 9C-D** shows that when the comparison is restricted to UGM and DDM models, variants  
709 of the UGM better explain the behavior of the monkeys than variants of the DDM, which is  
710 consistent with the findings of Hawkins et al. (2015a).

711 We can take things one step further and use *CHaRTr* to derive more insights into the behavior  
712 of the monkeys in this decision-making task, by examining whether urgency or the time constant  
713 of integration is a more important factor in explaining their behavior. **Fig. 10** shows quantile  
714 probability plots for five models:  $DDMS_{\nu}S_zS_t$ , a model from the DDM class without urgency  
715 but elaborated with variability in various parameters ( $S_{\nu}$ ,  $S_z$ ,  $S_t$ ), two models with Urgency and  
716 variability in some parameters ( $uDDMS_{\nu}S_t$ ,  $uDDMS_{\nu}S_b$ ), and two UGM models with variability  
717 in parameters ( $bUGMS_{\nu}S_b$ ,  $bUGMS_{\nu}S_t$ ). As shown in **Fig. 9**, addition of urgency dramatically  
718 improved the ability of these models to account for the decision-making behavior of the two  
719 monkeys. We next used *CHaRTr* for a preliminary analysis of whether the gating component  
720 of the urgency gating model improves model predictions over and above urgency alone. In both  
721 monkeys, we found that the data are slightly more consistent with models such as  $bUGMS_{\nu}S_b$  and  
722  $bUGMS_{\nu}S_t$ , models that involve urgency and gating with a 100 ms time constant of integration.  
723 These observations provide hypotheses for further analyses of the neural data and further targeted  
724 model selection.

725 Together, the results in **Fig. 9** and **Fig. 10** highlight the ease with which *CHaRTr* can be used  
726 to make insightful statements about behavior in decision-making tasks and ultimately may be a  
727 stepping stone for deeper insights into mechanism (Krakauer et al., 2017).

#### 728 4. Discussion

729 Advances in our understanding of decision making have come from three fronts: 1) through  
730 novel experimental manipulations of sensory stimuli (Brody and Hanks, 2016; Cisek et al., 2009;

731 Ratcliff, 2002; Ratcliff and Rouder, 2000; Smith and Ratcliff, 2009; Thura and Cisek, 2014)  
732 and/or task manipulations (Hanks et al., 2014), 2) recording neural data in a variety of decision-  
733 related structures in multiple model systems (Chandrasekaran et al., 2017; Coallier et al., 2015;  
734 Ding and Gold, 2012a; Hanks et al., 2015; Schall, 2001; Shadlen and Newsome, 2001; Thura  
735 et al., 2014) and 3) developing and testing quantitative cognitive models of choices, RTs, and  
736 other behavioral readouts from animal and human observers performing these decision-making  
737 tasks (Ratcliff and Smith, 2015). Quantitative modeling is a lynchpin in generating novel insights  
738 into cognitive processes such as decision-making. However, it has posed significant technical  
739 and computational challenges to the researcher. Widespread and rapid uptake of quantitative  
740 modeling requires software toolboxes that can easily implement the many sophisticated models  
741 of decision-making proposed in the literature (Diederich, 1997b; Ratcliff et al., 2016; Thura et  
742 al., 2012).

743 We contend that the ideal toolbox for developing and implementing cognitive models of decision-  
744 making and evaluating them against choice and RT data should be simple, offer a plurality of  
745 cognitive models, provide model estimation and model selection procedures, provide simple simu-  
746 lation and visualization tools, and be easily extensible when new hypotheses are developed. Such  
747 a view is broadly consistent with recent research that lays out the best practices for computa-  
748 tional modeling of behavior (Heathcote et al., 2015; Wilson and Collins, 2019). Ready adoption  
749 is also facilitated when the toolbox is implemented in an open-source, free programming language  
750 obviating the need for expensive licenses. The added benefit of an open source toolbox is that  
751 researchers can look "under the hood", which has at least three benefits: 1) allow a deeper level  
752 of understanding of the models, 2) readily permit extension of the toolbox, and 3) catch errors  
753 in implementation. At the time of development of this toolbox and submission of this study, no  
754 existing toolbox has satisfied all of these criteria.

755 *CHaRTr* was guided by these pragmatic principles, and is our attempt to provide a practical tool-  
756 box that encompasses a range of cognitive models of decision-making. Some of the models are  
757 grounded in classic random walk and diffusion models (Ratcliff, 1978; Stone, 1960). Others incor-  
758 porate modern hypotheses that decision-making behavior might involve signals such as urgency  
759 (Ditterich, 2006b), collapsing boundaries (Drugowitsch et al., 2012), and variable non-decision  
760 times (Ratcliff and Tuerlinckx, 2002). Since all of the source code is freely available, the toolbox  
761 thus provides a framework where models that are proposed into the future can also be imple-  
762 mented and contrasted against existing models. We provide a suite of functions for estimating  
763 the parameters of decision-making models, methods to compare log-likelihoods, and calculating  
764 penalized information criteria from these different models. Finally, the toolbox is developed in the  
765 R Statistical Environment, an open source language that is maintained by an active community  
766 of scientists and statisticians (R Core Team, 2016).

767 We anticipate that *CHaRTr* will provide a pathway to standardizing quantitative comparisons  
768 between models and across studies, and ultimately serve as one of the reference implementations  
769 for researchers interested in developing and experimentally testing candidate models of decision-  
770 making processes. *CHaRTr* also codifies the various parameters of decision-making models, which  
771 reflects the hypothesized latent constructs and how they interact, and provides easy access to

772 more than 20 models of behavioral performance in decision-making tasks including variants of  
773 the diffusion decision model, the urgency gating model, diffusion models with urgency signals,  
774 and diffusion models with collapsing boundaries. *CHaRTr* also offers pedagogical value because it  
775 allows the user to effortlessly simulate the many different models of decision-making and generate  
776 RT and choice data from hypothetical observers. *CHaRTr* will also allow quantitative evalua-  
777 tion of the predictions of various decision-making models and help move away from qualitative  
778 intuition-based predictions from these models. Finally, *CHaRTr* is also sufficiently flexible that  
779 users can implement novel models with their own specific assumptions.

780 *CHaRTr* provides researchers with the resources to apply and test more than 20 different, albeit  
781 overlapping, variants of decision-making models. We have argued throughout that model selection  
782 techniques ought to be used as a tool for selecting families of models to guide the next generation  
783 of experiments and further analyses, which is in the spirit of Burnham et al. (2011); we do not  
784 believe model selection should be used to justify categorical answers ("the best model"). In this  
785 sense, model selection is one tool in the whole gamut of tools that are needed to understand  
786 decision-making (Chandrasekaran et al., 2018)

787 The most promising approaches for advancing our understanding of decision-making will combine  
788 the rigorous model selection techniques we advocate here with novel experimental manipulations  
789 of stimulus statistics (Brody and Hanks, 2016; Cisek et al., 2009; Evans et al., 2017; Thura et al.,  
790 2014), task contingencies (Hanks et al., 2014; Heitz and Schall, 2012; Murphy et al., 2016; Thura  
791 and Cisek, 2016), and a range of other factors. We believe that validating and advancing models of  
792 decision-making will be facilitated by data that is freely available for the kinds of model estimation  
793 and model selection analyses we have performed here. Here, we took advantage of the freely  
794 available dataset from Roitman and Shadlen (2002). We anticipate the application of *CHaRTr*  
795 to many more decision-making datasets will help to form a coherent picture of how various  
796 latent cognitive processes affect the behavior of animal and human decision-making. This deeper  
797 understanding of decision-making behavior (Krakauer et al., 2017) will in turn facilitate a deeper  
798 understanding of decision-related neural responses (Chandrasekaran et al., 2017; Churchland et  
799 al., 2008; Cisek et al., 2009; Murphy et al., 2016; O'Connell et al., 2018; Purcell and Kiani, 2016;  
800 Thura et al., 2012).

801 Rigorous model selection techniques are even more relevant if we wish to make further inroads  
802 into understanding the neural correlates of decision-making. In particular, discriminating between  
803 multiple candidate models of decision-making is critical for neurophysiological studies of decision-  
804 making that attempt to relate neural responses in decision-related structures to the features of  
805 sequential sampling models (Ditterich, 2006a,b; Gold and Shadlen, 2007; Hanes and Schall, 1996;  
806 Heitz and Schall, 2012; Shadlen and Newsome, 2001; Thura et al., 2012). For example, one of  
807 the most well-established tenets of the neural basis of decision-making is the gradual ramp-like  
808 increase in the firing rates of individual neurons in decision-related structures such as the lateral  
809 intraparietal area (Roitman and Shadlen, 2002; Shadlen and Newsome, 2001), frontal eye fields  
810 (Ding and Gold, 2012a; Hanes and Schall, 1996), superior colliculus (Ratcliff et al., 2003, 2007),  
811 prefrontal cortex (Kim and Shadlen, 1999) and dorsal premotor cortex (Chandrasekaran et al.,  
812 2017; Coallier et al., 2015; Thura et al., 2014). However, questions still remain; for example,



813 is the ramp in a neuron's response a signature of the evidence integration process posited by a  
814 DDM or is it more consistent with the presence of, say, an increasing urgency signal. It can be  
815 challenging to neurally discriminate between frameworks without a clear hypothesis about 1) a  
816 detailed and ideally quantitative understanding of the behavior (Krakauer et al., 2017; O'Connell  
817 et al., 2018), and 2) the mapping from the underlying neural mechanisms to the observed behavior  
818 (Schall, 2004). We believe *CHaRTr* and other toolboxes of its ilk will play a critical role in further  
819 advancing our understanding of the neural correlates of decision-making.

#### 820 4.1. Future directions

821 *CHaRTr* provides a powerful framework for estimating and discriminating between candidate  
822 decision-making models. Nevertheless, there is considerable scope for extending its capabilities.  
823 Here, we outline a few future directions we believe would make *CHaRTr*, and other toolboxes  
824 that come in its wake, even more useful for decision-making researchers.

825 First, *CHaRTr* provides options to estimate sequential sampling models that assume *relative*  
826 evidence is accumulated over time. A related and compelling line of research assumes a race  
827 model architecture where a choice between  $n$  options is represented as a race between  $n$  evidence  
828 accumulators. The  $n \geq 2$  accumulators collect evidence in favor of their respective response  
829 options as a dynamic race toward their respective thresholds. The first accumulator to reach  
830 the threshold triggers a decision for the corresponding response option. There are a range of  
831 race models that differ in details, including accumulators that are independent (e.g., Brown  
832 and Heathcote, 2008; Reddi and Carpenter, 2000) or dependent (e.g., Usher and McClelland,  
833 2001). Naturally, these models can be elaborated with many features of the *relative* evidence  
834 accumulation models implemented in *CHaRTr*, including variable non-decision times and urgency  
835 (though see Bogacz et al., 2006; Zhang et al., 2014, for demonstration of the equivalence between  
836 relative and absolute evidence accumulation models under certain circumstances). Incorporation  
837 of race models in *CHaRTr* will be a useful extension into the future.

838 Second, the current instantiation of *CHaRTr* assumes that observers are independent. Recent  
839 efforts have proposed the use of hierarchical Bayesian methods for the DDM and other decision-  
840 making models (Ahn et al., 2017; Heathcote et al., 2018; Wiecki et al., 2013). Bayesian methods  
841 provide two advantages over the current framework provided in *CHaRTr*. Bayesian methods of  
842 parameter estimation incorporate prior knowledge into the plausible distribution of parameter val-  
843 ues, and provide full posterior distributions for all model parameters. *CHaRTr* currently provides  
844 only the most likely value for a parameter without any measure of its uncertainty, whereas the  
845 full posterior distribution provides uncertainty in the estimate for each parameter, thus reducing  
846 the likelihood of drawing over-confident conclusions. Bayesian methods are also advantageous  
847 when used in contexts where there are only modest numbers of trials per observer. Hierarchi-  
848 cal Bayesian models in particular can enhance statistical power by providing opportunities for  
849 simultaneous estimation of the parameters of individual observers as well as the population-level  
850 distributions from which they are drawn.

851 Despite these benefits, we emphasize that it is far from straightforward to extend the models

852 implemented in *CHaRTr* to Bayesian parameter estimation methods. The goal of *CHaRTr* is  
853 simple and rapid implementation and testing of new models, which takes place via simulation-  
854 based techniques. Bayesian methods require model likelihood functions, which can be challenging  
855 to derive and may not even exist for some of the models implemented in *CHaRTr*, and as such  
856 the extension to Bayesian methods is not trivial. In future work, we aim to extend the parameter  
857 estimation routines in *CHaRTr* to make use of approximate Bayesian techniques.

858 Third, the framework in *CHaRTr* is currently only amenable for analyzing behavior from decision-  
859 making tasks where the sensory stimulus provides constant evidence over time, albeit with noise,  
860 and varies along a single dimension. However, previous research suggests that a powerful way  
861 to dissociate between different models of decision-making is to use time-varying stimuli (Brody  
862 and Hanks, 2016; Brunton et al., 2013; Cisek et al., 2009; Ratcliff, 2002; Ratcliff and Rouder,  
863 2000; Smith and Ratcliff, 2009; Thura et al., 2014; Usher and McClelland, 2001). In a related  
864 vein, there has been increased interest in combining frameworks that posit sensory stimuli are  
865 optimally combined and could drive multisensory decision-making models (Chandrasekaran et  
866 al., 2017; Drugowitsch et al., 2014). Future versions of *CHaRTr* will provide opportunities for  
867 implementing and testing models in contexts where the sensory stimuli have temporal structure  
868 (Evans et al., 2017), or involve multi-sensory integration (Chandrasekaran et al., 2017).

869 Finally, *CHaRTr* currently allows the quality of the evidence signal (drift rate) to vary with an  
870 experimental factor (stimulus difficulty). In future versions of *CHaRTr*, we will provide capabilities  
871 for different model parameters to vary with different experimental factors. There are a range of  
872 other experimental manipulations whose effect will likely appear in model parameters other than  
873 the drift rate; for example, emphasizing the speed or accuracy of decisions is most likely to affect  
874 the decision boundary, or the speed with which a boundary collapses. Future versions of *CHaRTr*  
875 will allow researchers to test and discriminate between these hypotheses.

## 876 5. Acknowledgments

877 CC was supported by a NIH/NINDS R00 award 4R00NS092972-03. GH was supported by an  
878 Australian Research Council (ARC) Discovery Early Career Researcher Award (DECRA, award  
879 DE170100177) and an ARC Discovery Project (award DP180103613). Some of the model fits  
880 for simulated and real data were performed on the Shared Computing Cluster funded by an ONR  
881 DURIP N00014-17-1-2304 grant to Boston University. Some of the work was done under the  
882 auspices of Prof. Krishna Shenoy at Stanford University. We thank Prof. Shenoy for helpful  
883 discussions and advice, and Jessica Verhein and Megan Wang for insightful discussions.

- 884 ● Abstract: 228 words
- 885 ● Introduction: 902 words
- 886 ● Methods: 3067 words
- 887 ● Discussion: 1609 words

## 888 6. References

- 889 Ahn WY, Haines N, Zhang L (2017) Revealing neurocomputational mechanisms of  
890 reinforcement learning and decision-making with the hbayesdm package. *Computational*  
891 *Psychiatry* 1:24–57.
- 892 Aho K, Derryberry D, Peterson T (2014) Model selection for ecologists: the worldviews of aic  
893 and bic. *Ecology* 95:631–636.
- 894 Akaike H (1974) A new look at the statistical model identification. *IEEE Transactions on*  
895 *Automatic Control* 19:716–723.
- 896 Boehm U, Hawkins GE, Brown S, van Rijn H, Wagenmakers EJ (2016) Of monkeys and men:  
897 Impatience in perceptual decision-making. *Psychonomic Bulletin & Review* 23:738–749.
- 898 Bogacz R, Brown E, Moehlis J, Holmes P, Cohen JD (2006) The physics of optimal decision  
899 making: A formal analysis of models of performance in two–alternative forced choice tasks.  
900 *Psychological Review* 113:700–765.
- 901 Bowman NE, Kording KP, Gottfried JA (2012) Temporal integration of olfactory perceptual  
902 evidence in human orbitofrontal cortex. *Neuron* 75:916–927.
- 903 Brody CD, Hanks TD (2016) Neural underpinnings of the evidence accumulator. *Current*  
904 *opinion in neurobiology* 37:149–157.
- 905 Brown SD, Heathcote A (2008) The simplest complete model of choice reaction time: Linear  
906 ballistic accumulation. *Cognitive Psychology* 57:153–178.
- 907 Brunton BW, Botvinick MM, Brody CD (2013) Rats and humans can optimally accumulate  
908 evidence for decision-making. *Science* 340:95–98.
- 909 Burnham KP, Anderson DR, Huyvaert KP (2011) Aic model selection and multimodel inference  
910 in behavioral ecology: some background, observations, and comparisons. *Behavioral Ecology*  
911 *and Sociobiology* 65:23–35.
- 912 Carland MA, Thura D, Cisek P (2015) The urgency-gating model can explain the effects of  
913 early evidence. *Psychonomic bulletin & review* 22:1830–1838.
- 914 Chandrasekaran C, Peixoto D, Newsome WT, Shenoy KV (2017) Laminar differences in  
915 decision-related neural activity in dorsal premotor cortex. *Nature communications* 8:614.
- 916 Chandrasekaran C, Soldado-Magraner J, Peixoto D, Newsome WT, Shenoy K, Sahani M (2018)  
917 Brittleness in model selection analysis of single neuron firing rates. *bioRxiv* .
- 918 Churchland AK, Kiani R, Shadlen MN (2008) Decision-making with multiple alternatives.  
919 *Nature Neuroscience* 11:693–702.
- 920 Cisek P, Puskas GA, El-Murr S (2009) Decisions in changing conditions: The urgency–gating  
921 model. *The Journal of Neuroscience* 29:11560–11571.
- 922 Coallier É, Michelet T, Kalaska JF (2015) Dorsal premotor cortex: neural correlates of reach  
923 target decisions based on a color-location matching rule and conflicting sensory evidence.  
924 *Journal of neurophysiology* 113:3543–3573.
- 925 Diederich A (1997a) Dynamic stochastic models for decision making under time constraints.  
926 *Journal of Mathematical Psychology* 41:260–274.
- 927 Diederich A (1997b) Dynamic stochastic models for decision making under time constraints.  
928 *Journal of Mathematical Psychology* 41:260–274.
- 929 Ding L, Gold JI (2012a) Neural correlates of perceptual decision making before, during, and  
930 after decision commitment in monkey frontal eye field. *Cerebral Cortex* 22:1052–1067.
- 931 Ding L, Gold JI (2012b) Separate, causal roles of the caudate in saccadic choice and execution

- 932 in a perceptual decision task. *Neuron* 75:865–874.
- 933 Ditterich J (2006a) Evidence for time-variant decision making. *European Journal of*  
934 *Neuroscience* 24:3628–3641.
- 935 Ditterich J (2006b) Stochastic models of decisions about motion direction: Behavior and  
936 physiology. *Neural Networks* 19:981–1012.
- 937 Donkin C, Brown SD (2018) Response times and decision-making. *Stevens' Handbook of*  
938 *Experimental Psychology and Cognitive Neuroscience, Methodology* p. 349.
- 939 Drugowitsch J, Moreno-Bote R, Churchland AK, Shadlen MN, Pouget A (2012) The cost of  
940 accumulating evidence in perceptual decision making. *Journal of Neuroscience* 32:3612–3628.
- 941 Drugowitsch J, DeAngelis GC, Klier EM, Angelaki DE, Pouget A (2014) Optimal multisensory  
942 decision-making in a reaction-time task. *Elife* 3.
- 943 Eddelbuettel D, François R (2011) Rcpp: Seamless R and C++ integration. *Journal of*  
944 *Statistical Software* 40:1–18.
- 945 Evans NJ (in press) Assessing the practical differences between model selection methods in  
946 inferences about choice response time tasks. *Psychonomic Bulletin & Review* .
- 947 Evans NJ, Hawkins GE (2019) When humans behave like monkeys: Feedback delays and  
948 extensive practice increase the efficiency of speeded decisions. *Cognition* 184:11–18.
- 949 Evans NJ, Hawkins GE, Boehm U, Wagenmakers EJ, Brown SD (2017) The computations that  
950 support simple decision-making: A comparison between the diffusion and urgency-gating  
951 models. *Scientific reports* 7:16433.
- 952 Forstmann BU, Ratcliff R, Wagenmakers EJ (2016) Sequential sampling models in cognitive  
953 neuroscience: Advantages, applications, and extensions. *Annual Review of*  
954 *Psychology* 67:641–666.
- 955 Freedman DJ, Assad JA (2011) A proposed common neural mechanism for categorization and  
956 perceptual decisions. *Nature neuroscience* 14:143.
- 957 Gold JI, Shadlen MN (2007) The neural basis of decision making. *Annual Review of*  
958 *Neuroscience* 30:535–574.
- 959 Gondan M, Blurton SP, Kesselmeier M (2014) Even faster and even more accurate first-passage  
960 time densities and distributions for the wiener diffusion model. *Journal of Mathematical*  
961 *Psychology* 60:20 – 22.
- 962 Hanes DP, Schall JD (1996) Neural control of voluntary movement initiation.  
963 *Science* 274:427–430.
- 964 Hanks T, Kiani R, Shadlen MN (2014) A neural mechanism of speed-accuracy tradeoff in  
965 macaque area LIP. *eLife* 3:doi: 10.7554/eLife.02260.
- 966 Hanks TD, Mazurek ME, Kiani R, Hopp E, Shadlen MN (2011) Elapsed decision time affects  
967 the weighting of prior probability in a perceptual decision task. *Journal of*  
968 *Neuroscience* 31:6339–6352.
- 969 Hanks TD, Kopec CD, Brunton BW, Duan CA, Erlich JC, Brody CD (2015) Distinct  
970 relationships of parietal and prefrontal cortices to evidence accumulation. *Nature* 520:220.
- 971 Hawkins GE, Forstmann BU, Wagenmakers EJ, Ratcliff R, Brown SD (2015a) Revisiting the  
972 evidence for collapsing boundaries and urgency signals in perceptual decision-making. *Journal*  
973 *of Neuroscience* 35:2476–2484.
- 974 Hawkins GE, Wagenmakers EJ, Ratcliff R, Brown SD (2015b) Discriminating evidence  
975 accumulation from urgency signals in speeded decision making. *Journal of*  
976 *Neurophysiology* 114:40–47.

- 977 Heathcote A, Brown SD (2004) Reply to Speckman and Rouder: A theoretical basis for QML.  
978 *Psychonomic Bulletin & Review* 11:577–578.
- 979 Heathcote A, Brown SD, Mewhort DJK (2002) Quantile maximum likelihood estimation of  
980 response time distributions. *Psychonomic Bulletin & Review* 9:394–401.
- 981 Heathcote A, Brown SD, Wagenmakers EJ (2015) An introduction to good practices in  
982 cognitive modeling In Forstmann BU, Wagenmakers EJ, editors, *An Introduction to*  
983 *Model-Based Cognitive Neuroscience*. Springer, New York.
- 984 Heathcote A, Lin YS, Reynolds A, Strickland L, Gretton M, Matzke D (2018) Dynamic models  
985 of choice. *Behavior Research Methods* .
- 986 Heitz RP, Schall JD (2012) Neural mechanisms of speed–accuracy tradeoff. *Neuron* 76:616–628.
- 987 Hoshi E (2013) Cortico-basal ganglia networks subserving goal-directed behavior mediated by  
988 conditional visuo-goal association. *Frontiers in neural circuits* 7:158.
- 989 Kim JN, Shadlen MN (1999) Neural correlates of a decision in the dorsolateral prefrontal cortex  
990 of the macaque. *Nature neuroscience* 2:176.
- 991 Krakauer JW, Ghazanfar AA, Gomez-Marin A, Maclver MA, Poeppel D (2017) Neuroscience  
992 needs behavior: correcting a reductionist bias. *Neuron* 93:480–490.
- 993 Luce RD (1986) *Response Times* Oxford University Press, New York.
- 994 Milosavljevic M, Malmaud J, Huth A, Koch C, Rangel A (2010) The drift diffusion model can  
995 account for the accuracy and reactime of value–based choices under high and low time  
996 pressure. *Judgment and Decision Making* 5:437–449.
- 997 Mullen K, Ardia D, Gil D, Windover D, Cline J (2011) DEoptim: An R package for global  
998 optimization by differential evolution. *Journal of Statistical Software* 40:1–26.
- 999 Murphy PR, Boonstra E, Nieuwenhuis S (2016) Global gain modulation generates  
1000 time-dependent urgency during perceptual choice in humans. *Nature*  
1001 *communications* 7:13526.
- 1002 Navarro DJ, Fuss IG (2009) Fast and accurate calculations for first-passage times in wiener  
1003 diffusion models. *Journal of Mathematical Psychology* 53:222–230.
- 1004 O’Connell RG, Shadlen MN, Wong-Lin K, Kelly SP (2018) Bridging neural and computational  
1005 viewpoints on perceptual decision-making. *Trends in Neurosciences* .
- 1006 Palmer J, Huk AC, Shadlen MN (2005) The effect of stimulus strength on the speed and  
1007 accuracy of a perceptual decision. *Journal of Vision* 5:376–404.
- 1008 Purcell BA, Kiani R (2016) Neural mechanisms of post-error adjustments of decision policy in  
1009 parietal cortex. *Neuron* 89:658–671.
- 1010 R Core Team SHLIB: Build shared object/dll for dynamic loading.
- 1011 R Core Team (2016) *R: A Language and Environment for Statistical Computing* R Foundation  
1012 for Statistical Computing, Vienna, Austria.
- 1013 Ratcliff R (1978) A theory of memory retrieval. *Psychological Review* 85:59–108.
- 1014 Ratcliff R (2002) A diffusion model account of response time and accuracy in a brightness  
1015 discrimination task: Fitting real data and failing to fit fake but plausible data. *Psychonomic*  
1016 *Bulletin & Review* 9:278–291.
- 1017 Ratcliff R, Cherian A, Segraves M (2003) A comparison of macaque behavior and superior  
1018 colliculus neuronal activity to predictions from models of simple two–choice decisions. *Journal*  
1019 *of Neurophysiology* 90:1392–1407.
- 1020 Ratcliff R, Hasegawa YT, Hasegawa YP, Smith PL, Segraves MA (2007) Dual diffusion model  
1021 for single–cell recording data from the superior colliculus in a brightness–discrimination task.

- 1022 *Journal of Neurophysiology* 97:1756–1774.
- 1023 Ratcliff R, McKoon G (2008) The diffusion decision model: Theory and data for two-choice  
1024 decision tasks. *Neural Computation* 20:873–922.
- 1025 Ratcliff R, Rouder JN (2000) A diffusion model account of masking in two-choice letter  
1026 identification. *Journal of Experimental Psychology: Human Perception and*  
1027 *Performance* 26:127–140.
- 1028 Ratcliff R, Smith P (2015) Modeling simple decisions and applications using a diffusion model  
1029 In Busemeyer JR, Wang Z, Townsend JT, Eidels A, editors, *The Oxford Handbook of*  
1030 *Computational and Mathematical Psychology*, pp. 35–62. Oxford University Press.
- 1031 Ratcliff R, Smith PL, Brown SD, McKoon G (2016) Diffusion decision model: Current issues  
1032 and history. *Trends in Cognitive Sciences* 20:260–281.
- 1033 Ratcliff R, Tuerlinckx F (2002) Estimating parameters of the diffusion model: Approaches to  
1034 dealing with contaminant reaction times and parameter variability. *Psychonomic Bulletin &*  
1035 *Review* 9:438–481.
- 1036 Ratcliff R (2013) Parameter variability and distributional assumptions in the diffusion model.  
1037 *Psychological review* 120:281.
- 1038 Reddi BAJ, Carpenter RHS (2000) The influence of urgency on decision time. *Nature*  
1039 *Neuroscience* 3:827–830.
- 1040 Roitman JD, Shadlen MN (2002) Responses of neurons in the lateral intraparietal area during a  
1041 combined visual discrimination reaction time task. *Journal of Neuroscience* 22:9475–9489.
- 1042 Schall JD (2001) Neural basis of deciding, choosing, and acting. *Nature Reviews*  
1043 *Neuroscience* 2:33–42.
- 1044 Schall JD (2004) On building a bridge between brain and behavior. *Annual Review of*  
1045 *Psychology* 55:23–50.
- 1046 Schwarz G (1978) Estimating the dimension of a model. *Annals of Statistics* 6:461–464.
- 1047 Scott BB, Constantinople CM, Erlich JC, Tank DW, Brody CD (2015) Sources of noise during  
1048 accumulation of evidence in unrestrained and voluntarily head-restrained rats. *Elife* 4:e11308.
- 1049 Shadlen MN, Kiani R (2013) Decision making as a window on cognition. *Neuron* 80:791–806.
- 1050 Shadlen MN, Newsome WT (2001) Neural basis of a perceptual decision in the parietal cortex  
1051 (area LIP) of the rhesus monkey. *Journal of Neurophysiology* 86:1916–1936.
- 1052 Smith PL (2000) Stochastic dynamic models of response time and accuracy: A foundational  
1053 primer. *Journal of Mathematical Psychology* 44:408–463.
- 1054 Smith PL, Ratcliff R (2009) An integrated theory of attention and decision making in visual  
1055 signal detection. *Psychological Review* 116:283–317.
- 1056 Stone M (1960) Models for choice–reaction time. *Psychometrika* 25:251–260.
- 1057 Tajima S, Drugowitsch J, Pouget A (2016) Optimal policy for value-based decision-making.  
1058 *Nature communications* 7:12400.
- 1059 Thura D, Beauregard–Racine J, Fradet CW, Cisek P (2012) Decision making by urgency  
1060 gating: Theory and experimental support. *Journal of Neurophysiology* 108:2912–2930.
- 1061 Thura D, Cisek P (2014) Deliberation and commitment in the premotor and primary motor  
1062 cortex during dynamic decision making. *Neuron* 81:1401–1416.
- 1063 Thura D, Cisek P (2016) Modulation of premotor and primary motor cortical activity during  
1064 volitional adjustments of speed-accuracy trade-offs. *Journal of Neuroscience* 36:938–956.
- 1065 Thura D, Cos I, Trung J, Cisek P (2014) Context-dependent urgency influences speed-accuracy  
1066 trade-offs in decision-making and movement execution. *The Journal of neuroscience : the*

- 1067 *official journal of the Society for Neuroscience* 34:16442–16454.
- 1068 Tsunada J, Liu ASK, Gold JI, Cohen YE (2016) Causal contribution of primate auditory cortex  
1069 to auditory perceptual decision-making. *Nature neuroscience* 19:135–142.
- 1070 Usher M, McClelland JL (2001) On the time course of perceptual choice: The leaky competing  
1071 accumulator model. *Psychological Review* 108:550–592.
- 1072 Vandekerckhove J, Tuerlinckx F (2008) Diffusion model analysis with MATLAB: A DMAT  
1073 primer. *Behavior Research Methods* 40:61–72.
- 1074 Voss A, Voss J (2007) Fast-dm: A free program for efficient diffusion model analysis. *Behavior*  
1075 *Research Methods* 39:767–775.
- 1076 Voss A, Voss J (2008) A fast numerical algorithm for the estimation of diffusion model  
1077 parameters. *Journal of Mathematical Psychology* 52:1–9.
- 1078 Wagenmakers EJ, Farrell S (2004) AIC model selection using Akaike weights. *Psychonomic*  
1079 *Bulletin & Review* 11:192–196.
- 1080 Wald A, Wolfowitz J (1948) Optimal character of the sequential probability ratio test. *Annals*  
1081 *of Mathematical Statistics* 19:326–339.
- 1082 Wasserman L (2000) Bayesian model selection and model averaging. *Journal of Mathematical*  
1083 *Psychology* 44:92–107.
- 1084 Wiecki TV, Sofer I, Frank MJ (2013) HDDM: Hierarchical Bayesian estimation of the  
1085 drift-diffusion model in Python. *Frontiers in*  
1086 *Neuroinformatics* 7:n/a. doi: 10.3389/fninf.2013.00014.
- 1087 Wilson RC, Collins A (2019) Ten simple rules for the computational modeling of behavioral  
1088 data.
- 1089 Zhang S, Lee MD, Vandekerckhove J, Maris G, Wagenmakers EJ (2014) Time-varying  
1090 boundaries for diffusion models of decision making and response time. *Frontiers in*  
1091 *Psychology* 5:1364.

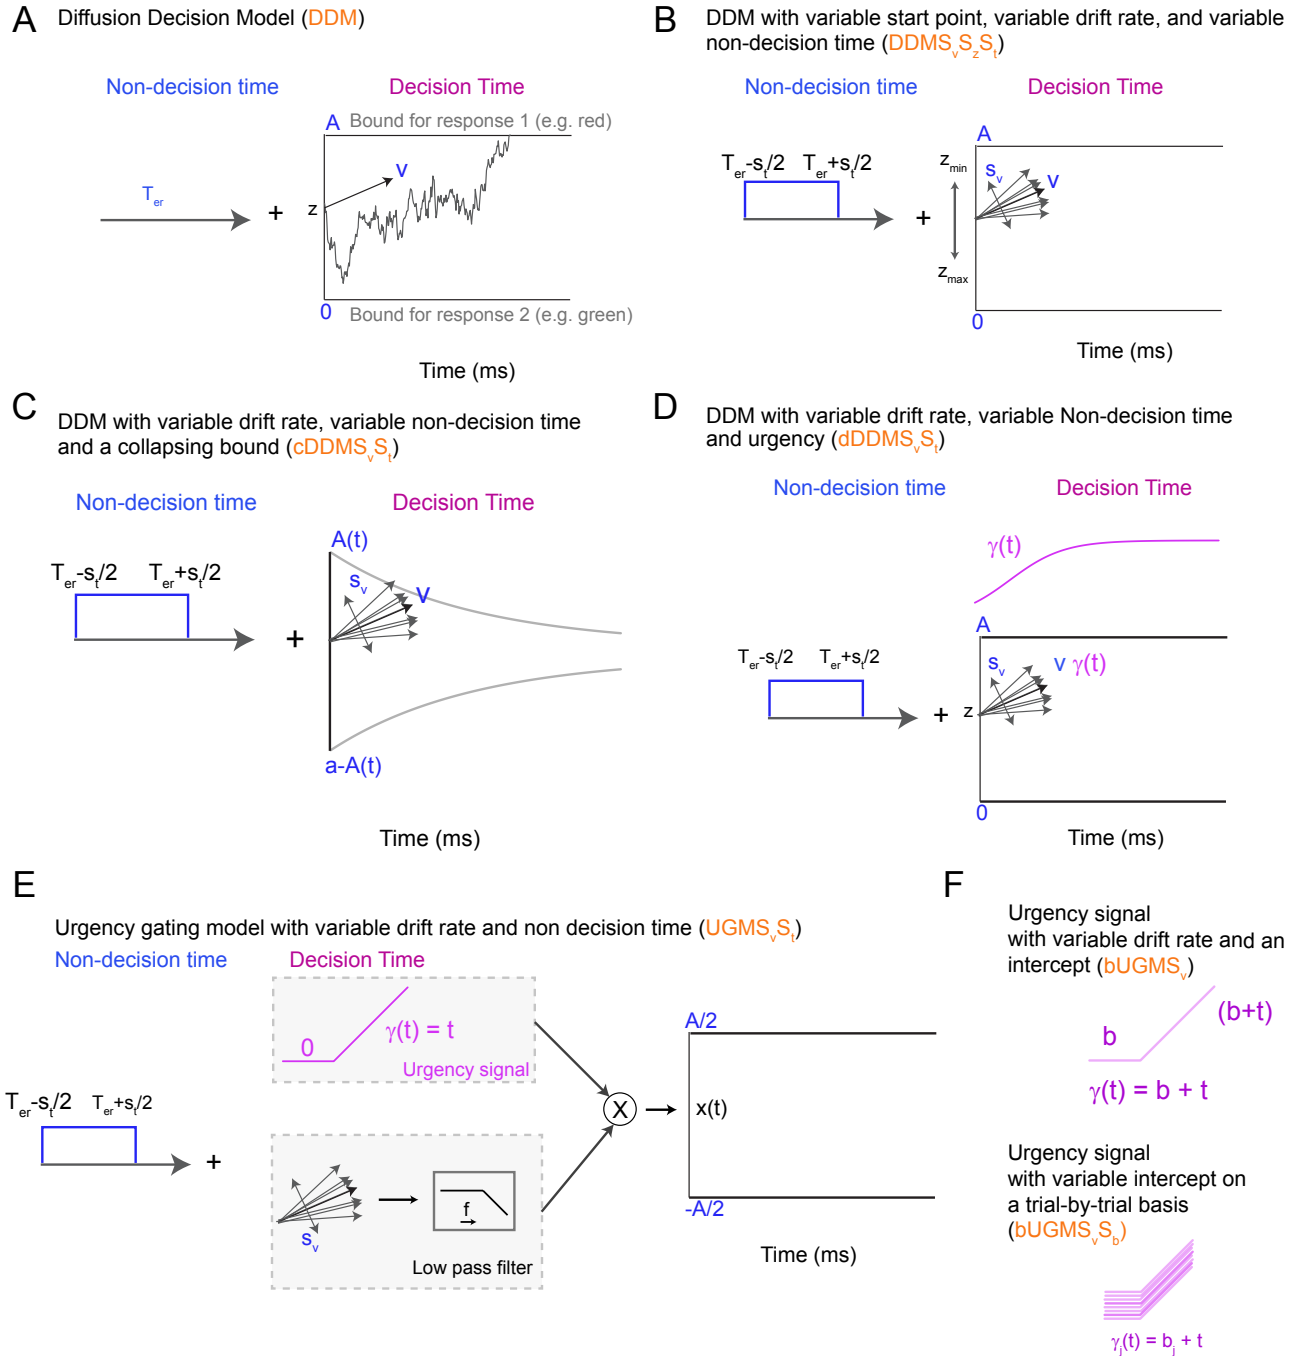

**Figure 1:** Schematic of some sequential sampling models of decision-making incorporated in *CHaRTr*. (A) The DDM model is the simplest example of a diffusion model of decision-making. (B) A variant of the DDM with variable non-decision time ( $S_t$ ), variable drift-rate ( $S_v$ ) and a variable start point ( $S_z$ ). (C) A DDM with collapsing bounds and variability in the non-decision time and drift rate. The function  $A(t)$  takes the form of a Weibull function as defined in Equation 6. (D) A variant of the DDM with variable non-decision time and drift rate, and an “urgency signal”. This urgency signal grows with elapsed decision time, which is implemented by multiplying the decision variable by the increasing function of time  $\gamma(t)$  (Equation 10, following Ditterich, 2006a). (E) UGM with variable drift rate ( $S_v$ ) and variable non decision time ( $S_t$ ). In the standard UGM, the urgency signal is only thought to depend on time and thus starts at 0. The sensory evidence is passed through a low pass filter (typically a 100-250 ms time constant, Carland et al., 2015; Thura et al., 2012). The sensory evidence is then multiplied by the urgency signal to lead to a decision variable that is then compared to boundaries. (F) Schematic of urgency signals with an intercept (top panel) and a variable intercept (bottom panel)



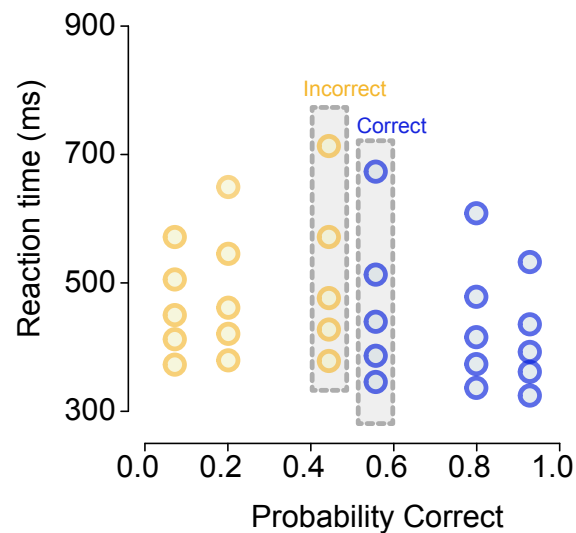

**Figure 2:** A quantile probability (QP) plot of choice and RT data from a hypothetical decision-making experiment with three levels of stimulus difficulty. The three difficulty levels are represented as vertical columns mirrored around the midpoint of the  $x$ -axis (.5). In this example, the lowest accuracy condition had  $\sim 55\%$  correct responses, so the RTs for correct responses in this condition are located at  $.55$  on the  $x$ -axis and the corresponding RTs for error responses are located at  $1 - .55 = .45$  on the  $x$ -axis; these two RT distributions are highlighted in gray bars. For each RT distribution we plot along the  $y$ -axis the 10<sup>th</sup>, 30<sup>th</sup>, 50<sup>th</sup>, 70<sup>th</sup>, 90<sup>th</sup> percentiles (i.e., .1, .3, .5, .7, .9 quantiles), separately for correct and error responses in each of the three difficulty levels. For clarity, correct responses are shown in blue and error responses are shown in yellow.

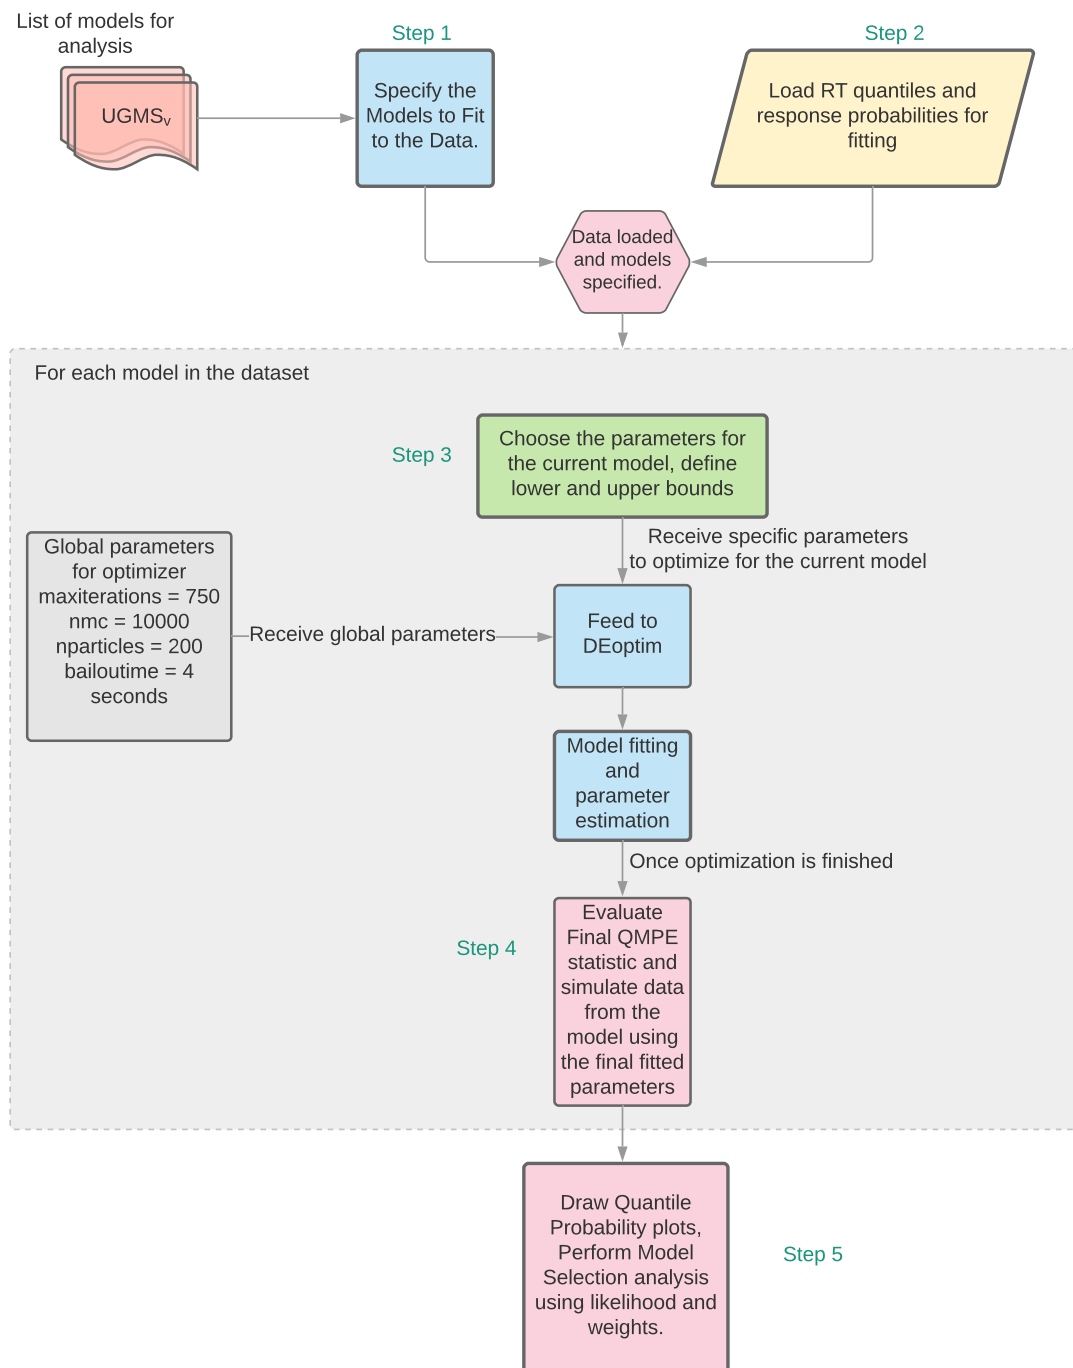

**Figure 3:** CHaRT flow chart. Models are specified and once data is available, the parameters are estimated through the optimization procedure. Once parameter estimation is complete, the final goodness of fit statistic is calculated for every model under consideration, which is used for subsequent model selection analyses.

Step 4: Model Fitting and Parameter Estimation

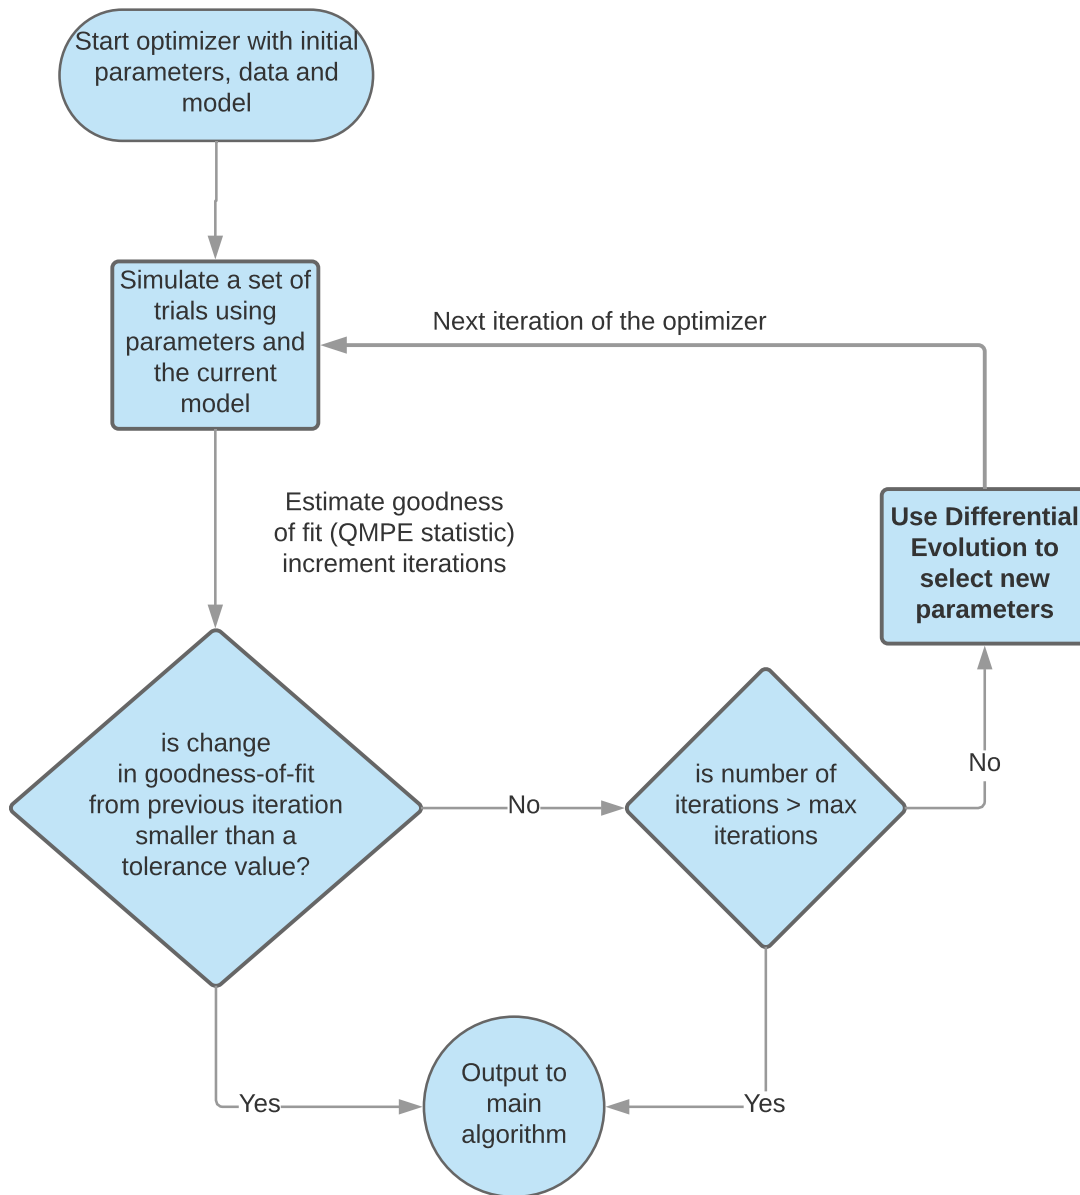

**Figure 4:** Flow chart for the parameter estimation component of *CHaRTr*, which uses the differential evolution optimization algorithm (Mullen et al., 2011).

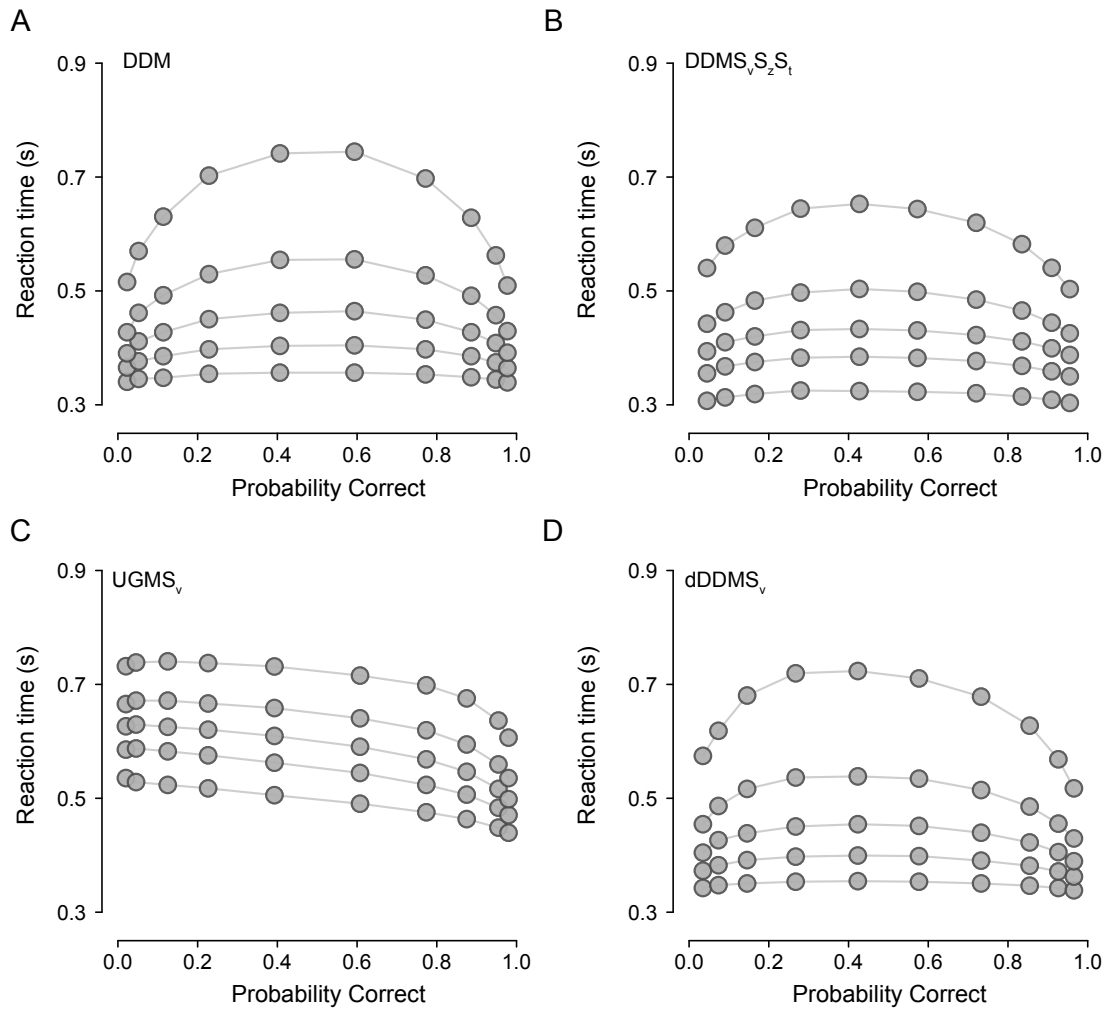

**Figure 5:** Quantile probability plots of data simulated from four models in *CHaRTr*. (A) DDM, (B) DDM with variable drift rates, starting state and non-decision time (DDMS<sub>v</sub>S<sub>z</sub>S<sub>t</sub>), (C) Urgency gating model with variable drift rates (UGMS<sub>v</sub>), and (D) DDM with an urgency signal defined as per Ditterich (2006a) (dDDMS<sub>v</sub>). Gray points denote data. Lines are drawn for visualization purposes.

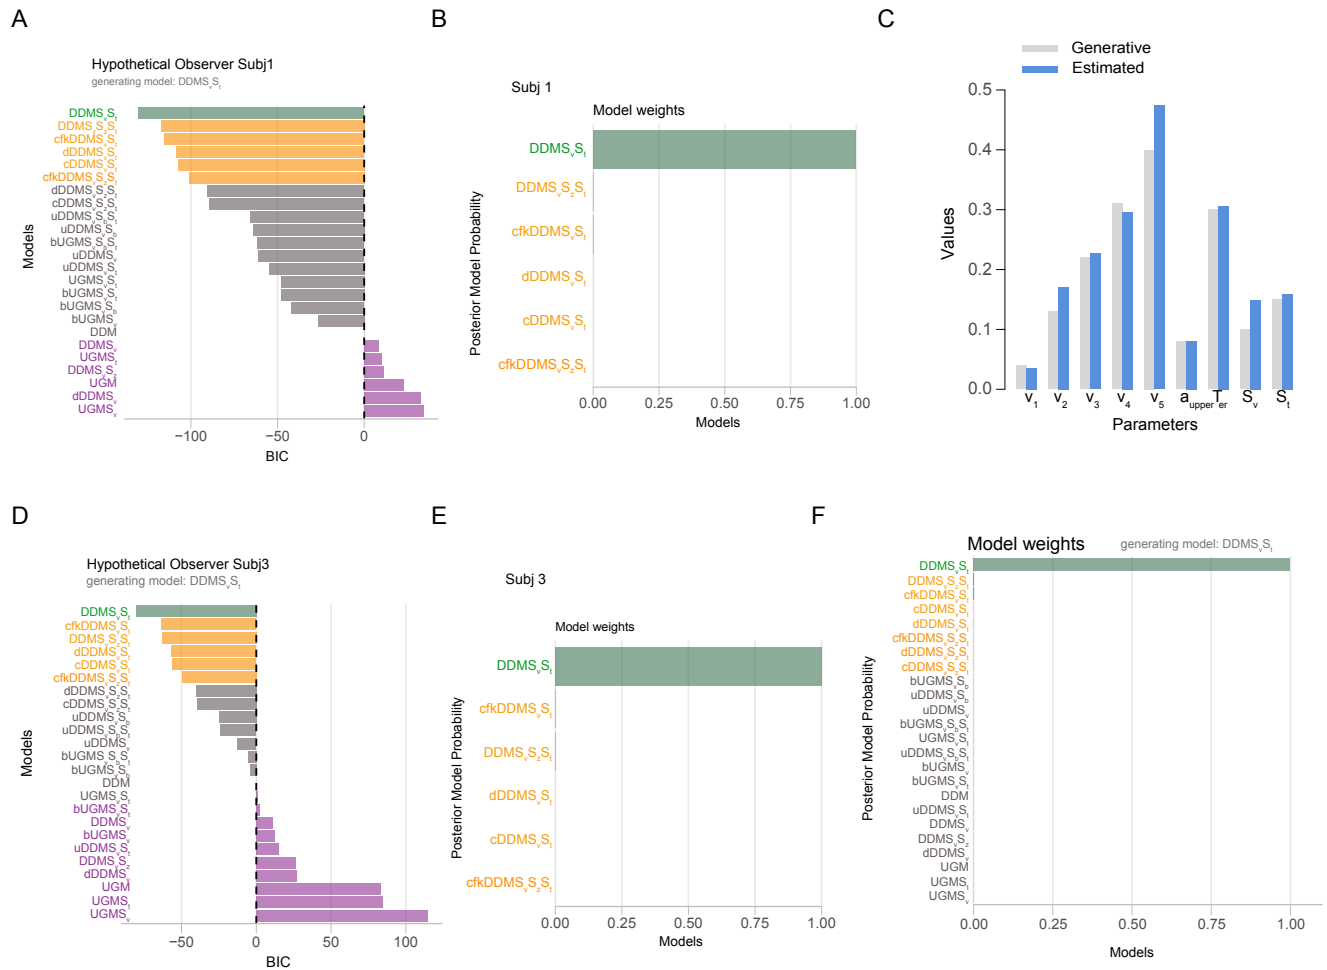

**Figure 6:** Model selection and parameter estimation outcomes from applying a range of cognitive models of decision-making to hypothetical data from two observers (case study 1). A-C shows outcomes from one hypothetical observer. D-E shows outcomes from a second hypothetical observer. Data were generated using the model  $DDMS_{v,S_t}$ . A) BIC values as a function of model with the DDM model as the reference. B) Akaike weights for the top six models that provided the best account of the data. *CHaRT* correctly identifies the true data-generating model ( $DDMS_{v,S_t}$ ) as the most likely candidate for describing the data. C) Data-generative and estimated parameter values for the  $DDMS_{v,S_t}$  model shown in A. Close alignment indicates *CHaRT* recovered the true parameter values. D-E shows the BIC values and posterior model probabilities from another hypothetical observer. F) Shows the average posterior model probabilities across all five hypothetical observers, assuming them to be independent. Reassuringly,  $DDMS_{v,S_t}$  is identified as the most plausible model for the data.

Subj1

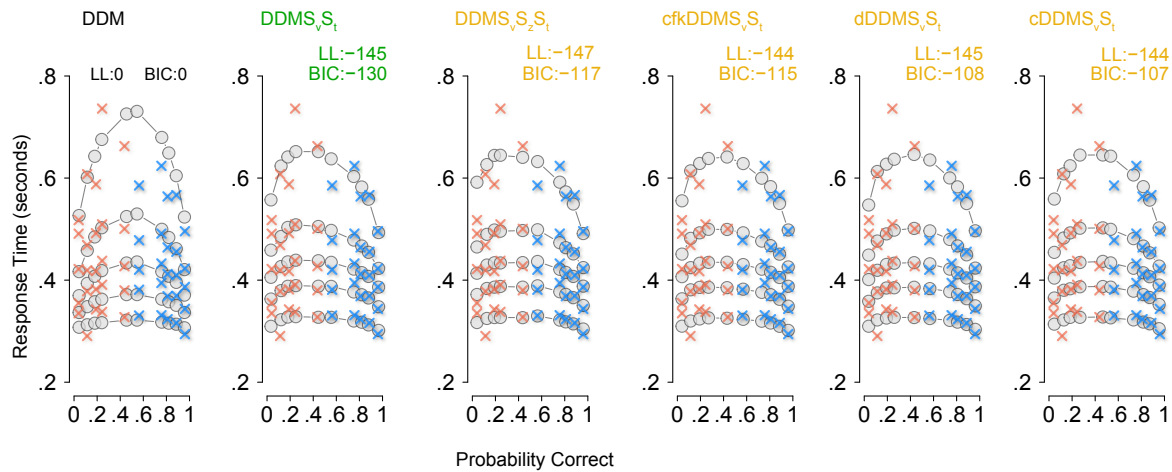

Subj3

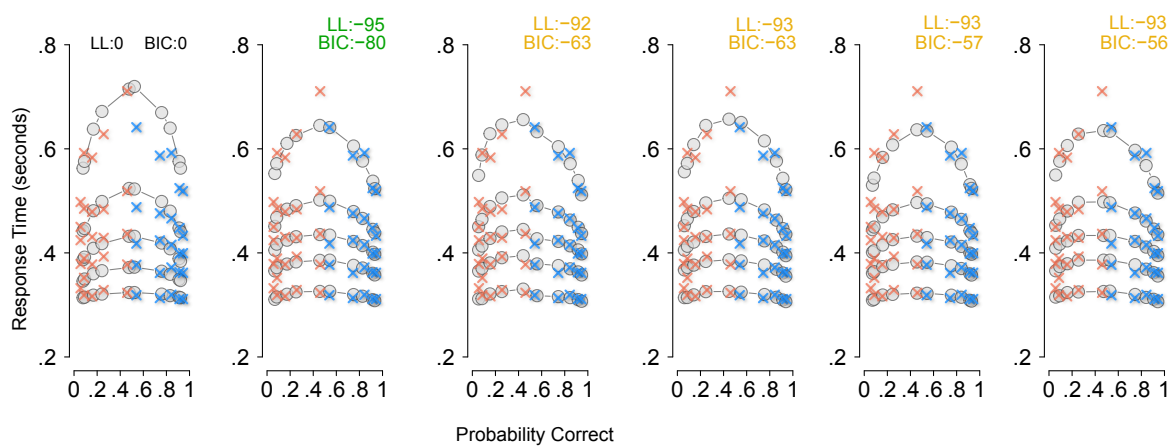

**Figure 7:** Quantile probability (QP) plots showing correct RTs (blue) and error RTs (orange) for two hypothetical observers (case study 1), along with the model predictions (gray dots). Predictions from the four best-fitting models are shown along with the simplest model the DDM. The four best fitting models are DDMS<sub>v</sub>S<sub>t</sub>, cfkDDMS<sub>v</sub>S<sub>t</sub>, dDDMS<sub>v</sub>S<sub>t</sub>, cDDMS<sub>v</sub>S<sub>t</sub> are shown. Numbers at the top of each plot show the BIC for the model under consideration, assuming the DDM as the base (reference) model. The model DDMS<sub>v</sub>S<sub>t</sub> provides the best account of the data.

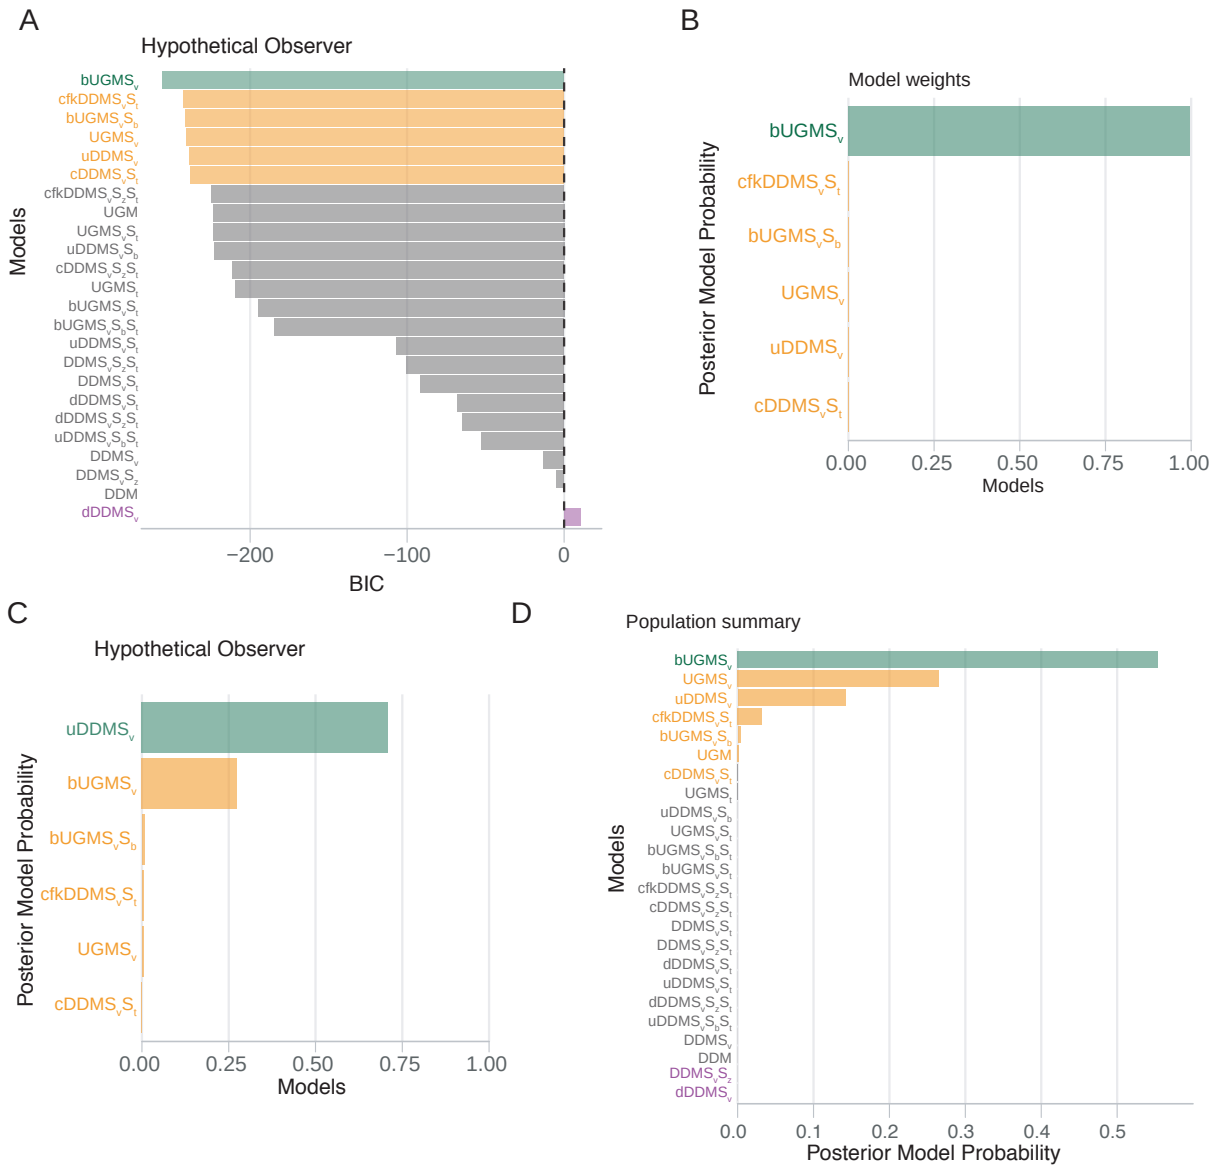

**Figure 8:** Model selection and parameter estimation outcomes from applying a range of cognitive models of decision-making to data from a hypothetical observer. Decision-making in this hypothetical observer is controlled by the model bUGMS<sub>v</sub>. A) BIC values as a function of model with the DDM model as the reference for one hypothetical observer, Subj 3. B) Posterior model probabilities for the top six models that provided the best account of Subj 3's behavior. C) Results for another hypothetical subject. D) Results for the population of hypothetical subjects. The most probable model for this set of hypothetical observers is the generative model, bUGM S<sub>v</sub>. However, we note that other models such as UGMS<sub>v</sub>, and uDDMS<sub>v</sub> provide quite good descriptions of the behavior. This result is in keeping with the general notion that model selection ought to be used as a guide to the most likely models and not necessarily to argue for a "best" model.

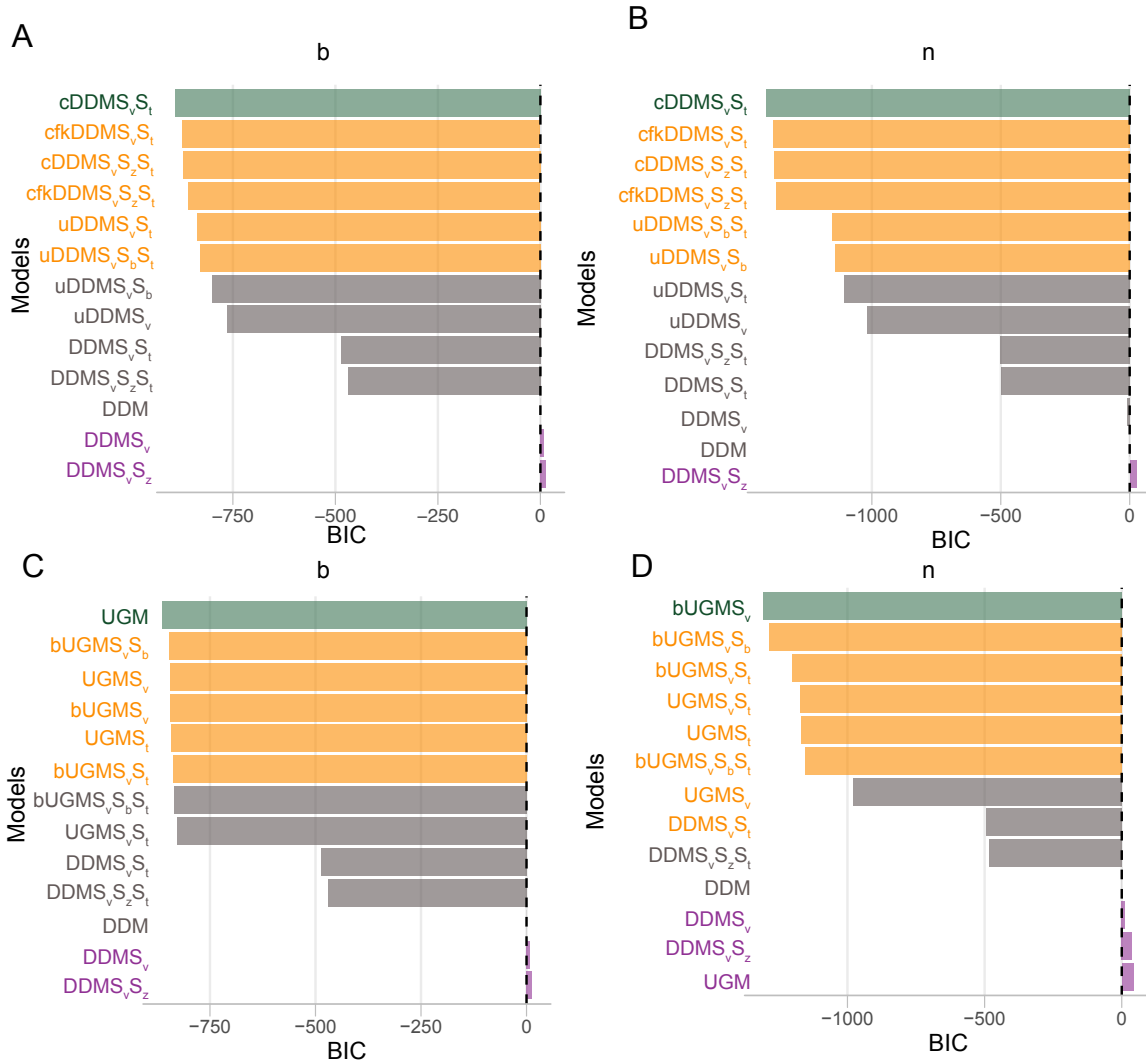

**Figure 9:** Model selection outcomes from applying a range of cognitive models of decision-making to data from two monkeys (Roitman and Shadlen, 2002). A-B shows outcomes from monkey b and n to compare models with various forms of urgency vs. simple diffusion decision models without impatience. For both monkeys, *CHaRT<sub>r</sub>* suggests models with urgency are better candidates for describing the data than DDMs without urgency. C-D shows outcomes from the monkeys b and n when comparing UGM vs. DDM models. For both monkeys, UGM based models substantially outperform the DDM based models



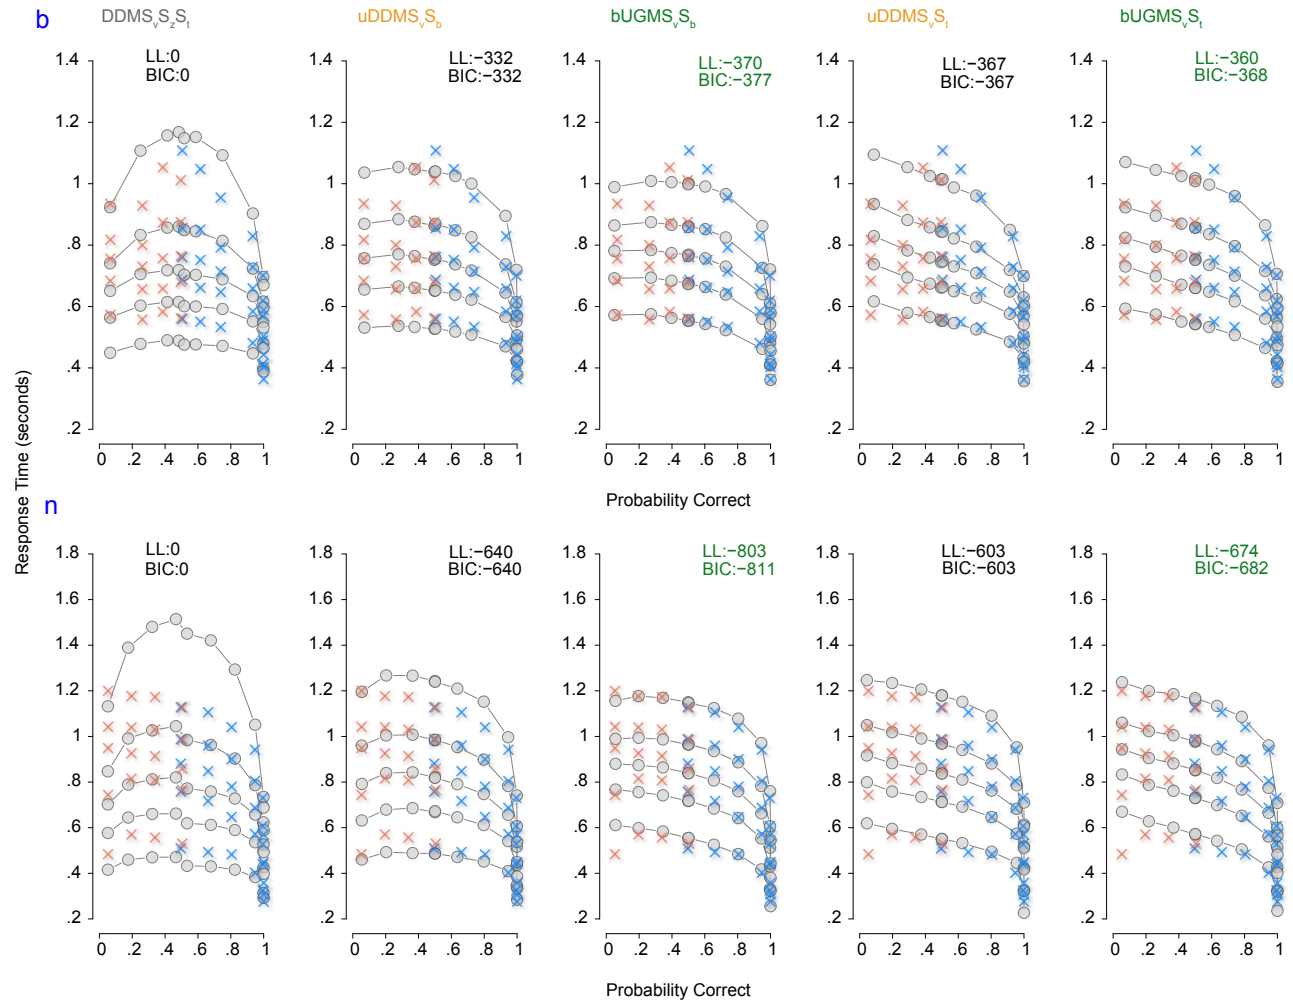

**Figure 10:** Quantile probability (QP) plots showing data in blue (corrects) and yellow crosses (errors) for the two monkeys from Roitman and Shadlen (2002), along with the model predictions (gray dots). Predictions from DDMS<sub>v</sub>S<sub>z</sub>S<sub>t</sub> are shown along with four other models uDDMS<sub>v</sub>S<sub>b</sub>, bUGMS<sub>v</sub>S<sub>b</sub>, uDDMS<sub>v</sub>S<sub>t</sub>, bUGMS<sub>v</sub>S<sub>t</sub>. Numbers at the top of each plot show the BIC for the model under consideration, assuming DDMS<sub>v</sub>S<sub>z</sub>S<sub>t</sub> as the base (reference) model. For both monkeys the model bUGMS<sub>v</sub>S<sub>b</sub> is the best model for describing the data out of these candidate set of models
